# Supplementary material
Source: publisher figshare collection journal article supplement (https://acs.figshare.com/ndownloader/files/23086412)
Supplement: Supplementary file 1 [file 23086412]

# One-Pot Aldol Cascade for the Preparation of Isospiropyrans, Flavylum Salts and *bis*-Spiropyrans

Taylor A. Neal,<sup>[a]</sup> Allyson B. Eippert,<sup>[a]</sup> Austin Chivington,<sup>[b]</sup> Andrew Jamison,<sup>[b]</sup> Chukwunalu Chukwuma,<sup>[b]</sup> Curtis E. Moore,<sup>[a]</sup> Jennifer F. Neal,<sup>[a]</sup> Heather C. Allen,<sup>[a]</sup> Laura M. Wysocki,<sup>[b]</sup> Noel M. Paul,<sup>[a]</sup> Jovica D. Badjić\*<sup>[a]</sup>

<sup>[a]</sup>Department of Chemistry and Biochemistry, The Ohio State University, 100 West 18th Avenue, Columbus Ohio 43210 (USA)

E-mail: [badjic.1@osu.edu](mailto:badjic.1@osu.edu)

<sup>[b]</sup>Department of Chemistry, Wabash College, 301 W. Wabash Avenue, Crawfordsville, IN 47933.

## SUPPORTING INFORMATION

## Table of Contents

|                                |         |
|--------------------------------|---------|
| 1. Spectroscopic data.....     | S1-S28  |
| 2. UV-Vis spectroscopy.....    | S29     |
| 3. Crystallographic Data ..... | S30-S49 |

## Spectroscopic Data

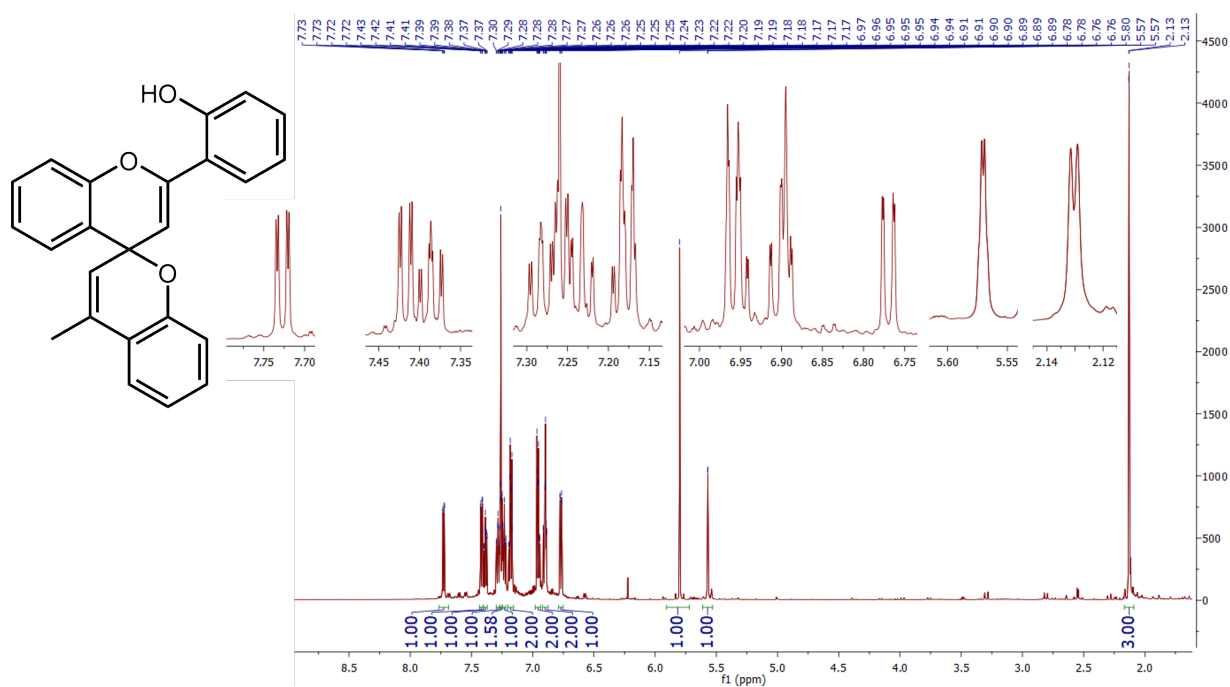

**Figure S1.** <sup>1</sup>H NMR spectrum (600 MHz, 298 K) of isospiropyran **11** in CDCl<sub>3</sub>.

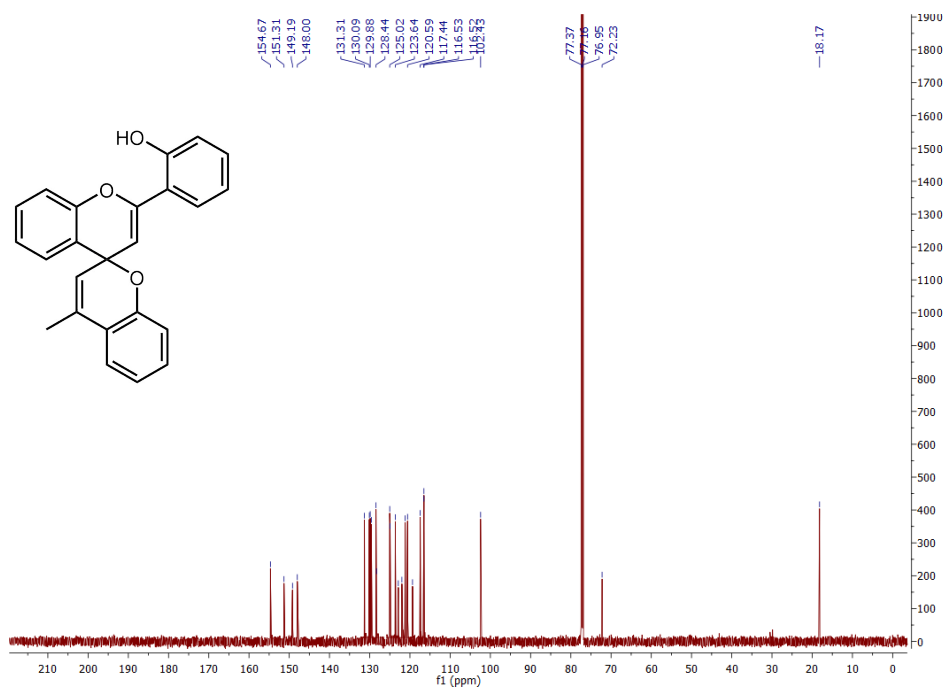

**Figure S2.** <sup>13</sup>C NMR spectrum (150 MHz, 298 K) of isospiropyran **11** in CDCl<sub>3</sub>.

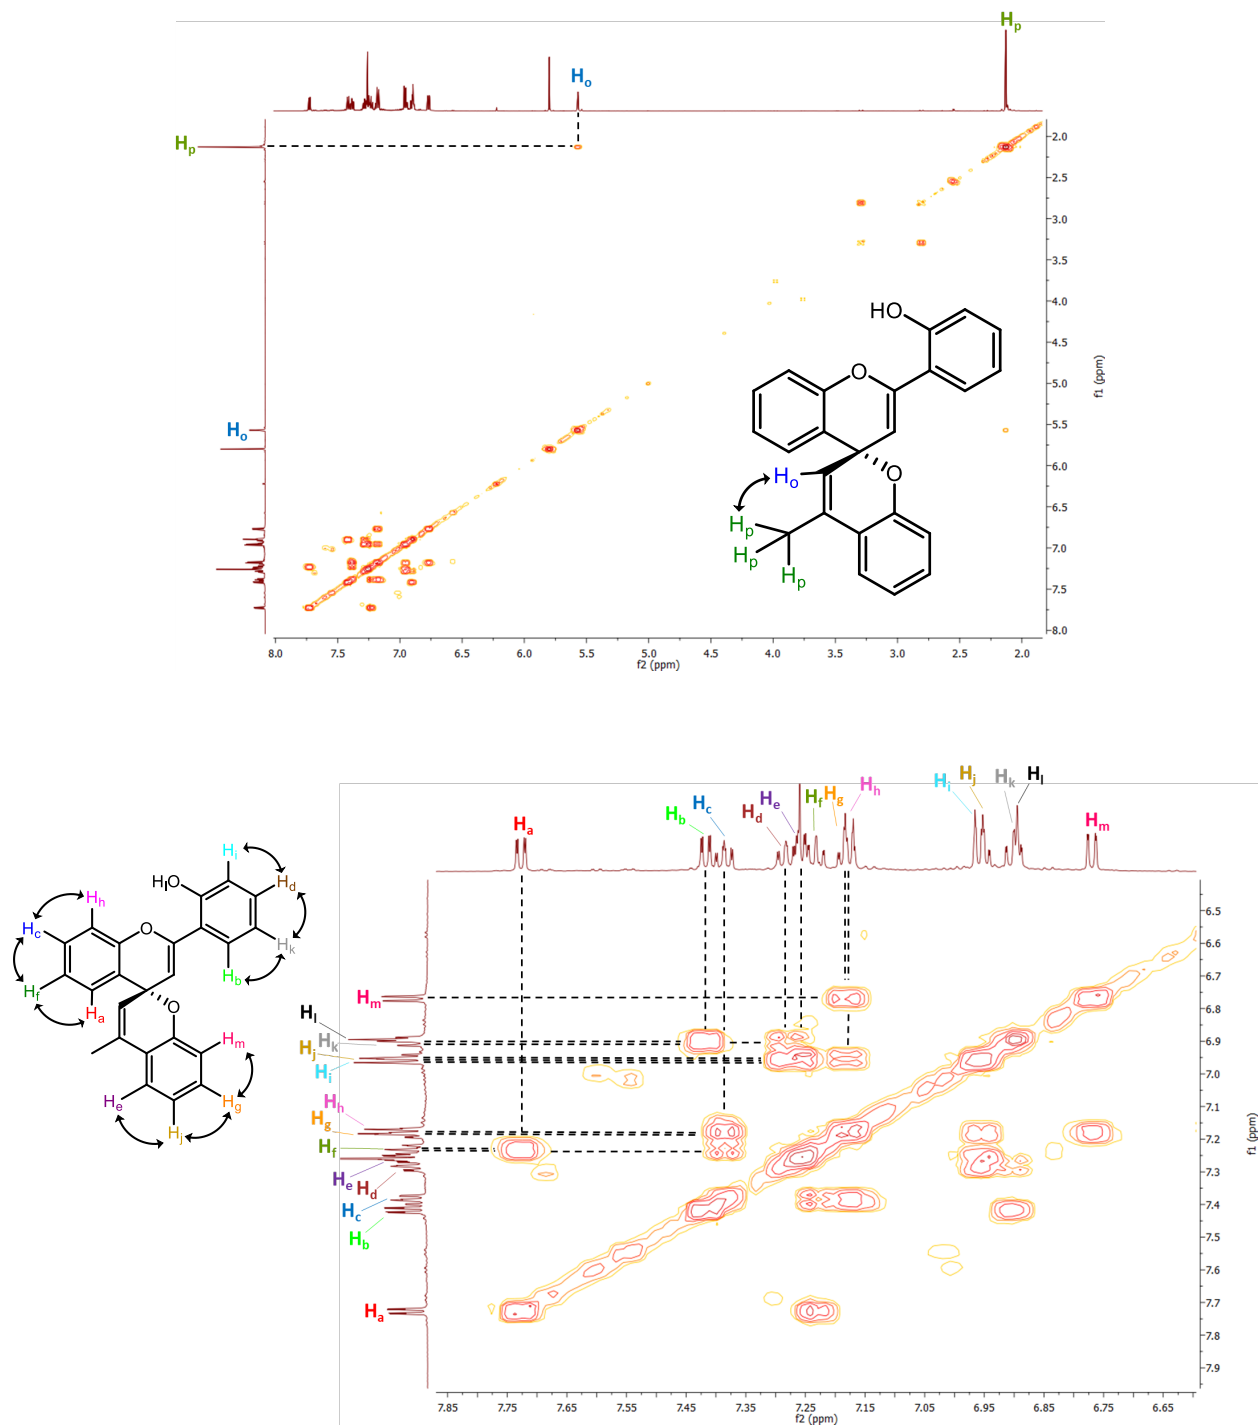

**Figure S3.** Two different regions of  $^1\text{H}$ - $^1\text{H}$  COSY NMR (600 MHz, 298 K) spectrum of isospiropyran **11** in  $\text{CDCl}_3$ .



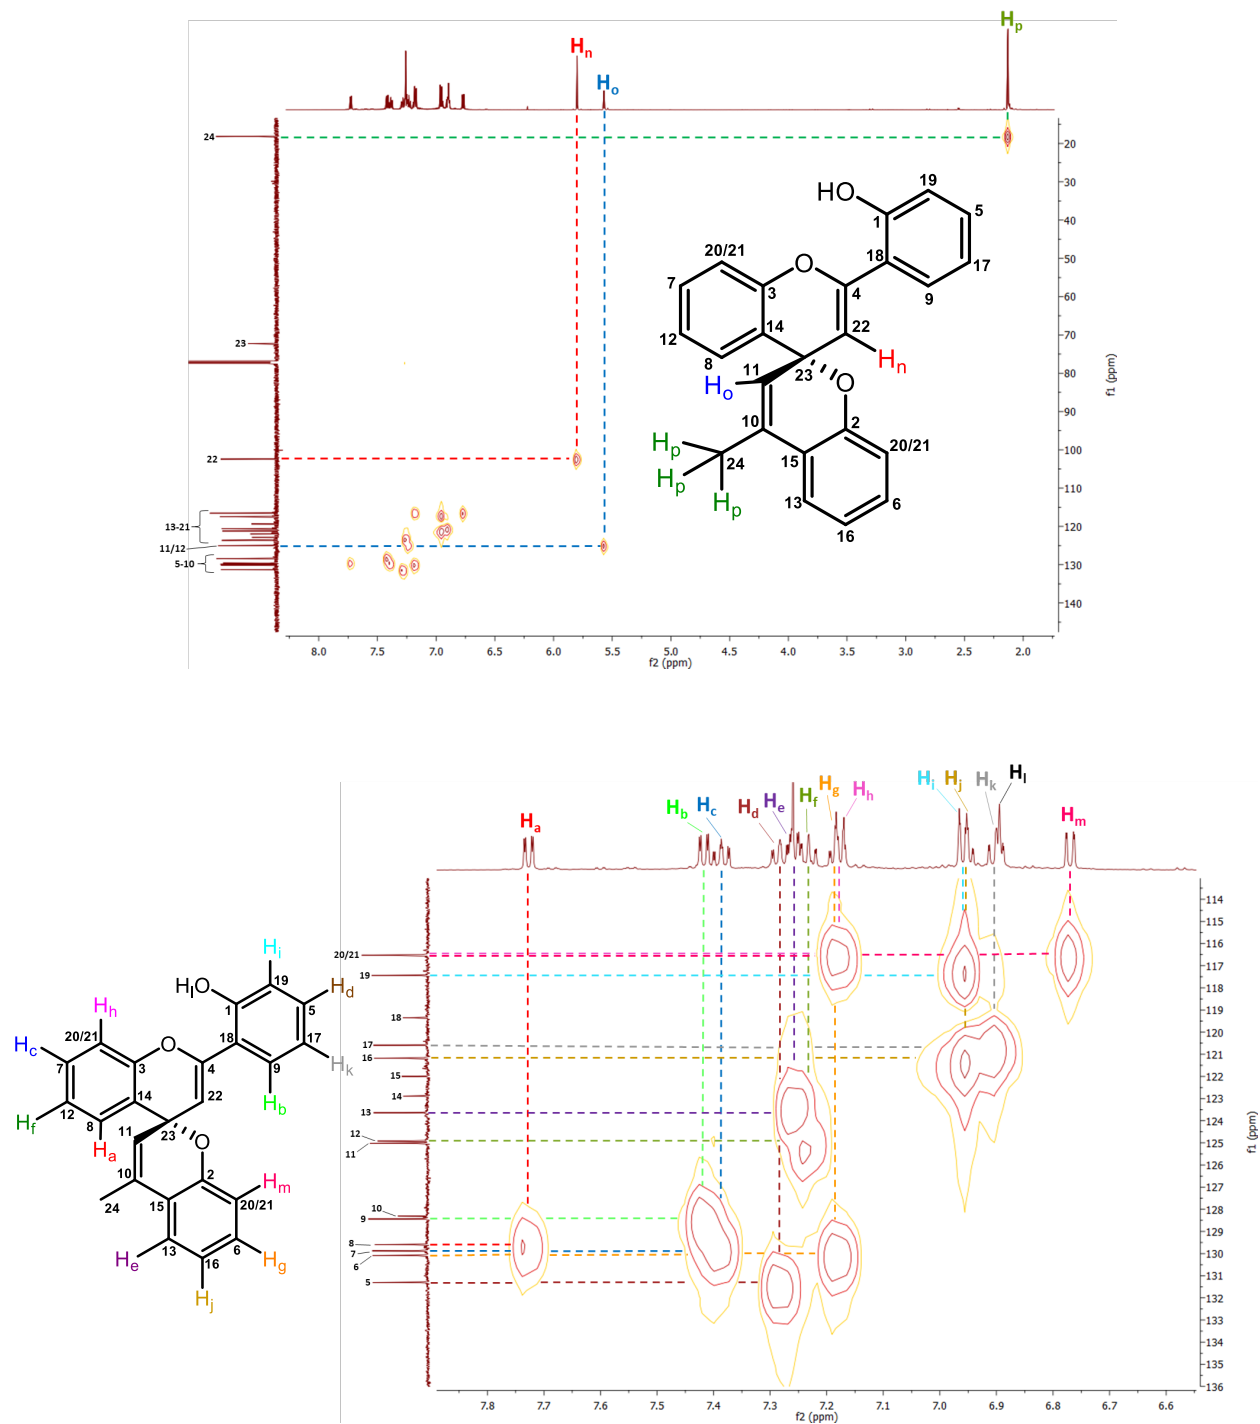

**Figure S4.** Two different regions of  $^1\text{H}$ - $^{13}\text{C}$  HSQC NMR (600 MHz, 298 K) spectrum of isospiropyran **11** in  $\text{CDCl}_3$ .

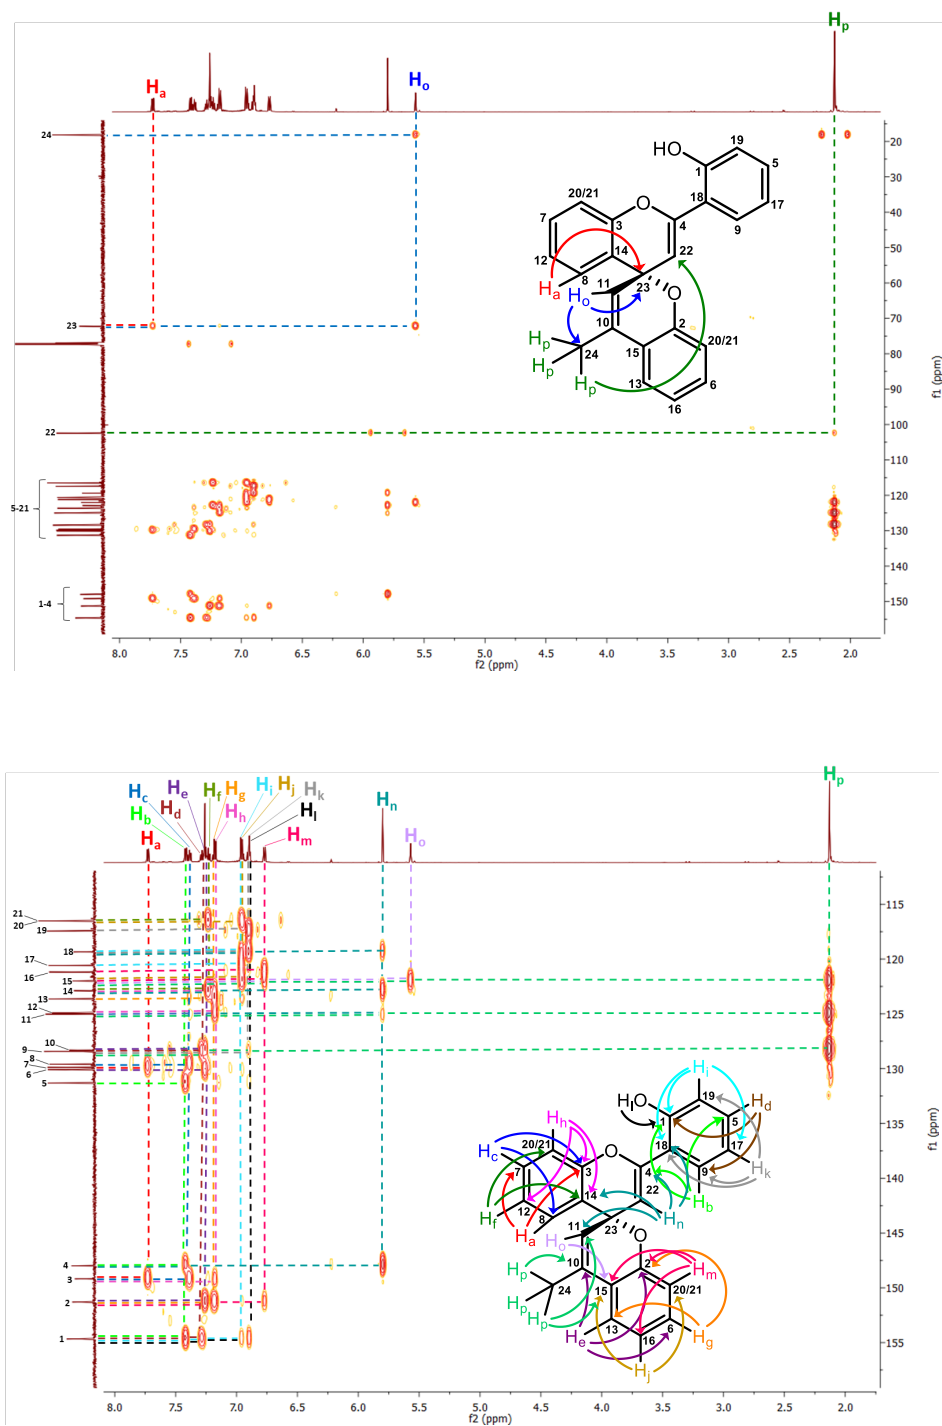

**Figure S5.** Two different regions of  $^1\text{H}$ - $^{13}\text{C}$  HMBC NMR (600 MHz, 298 K) spectrum of isopiripyrans **11** in  $\text{CDCl}_3$ .

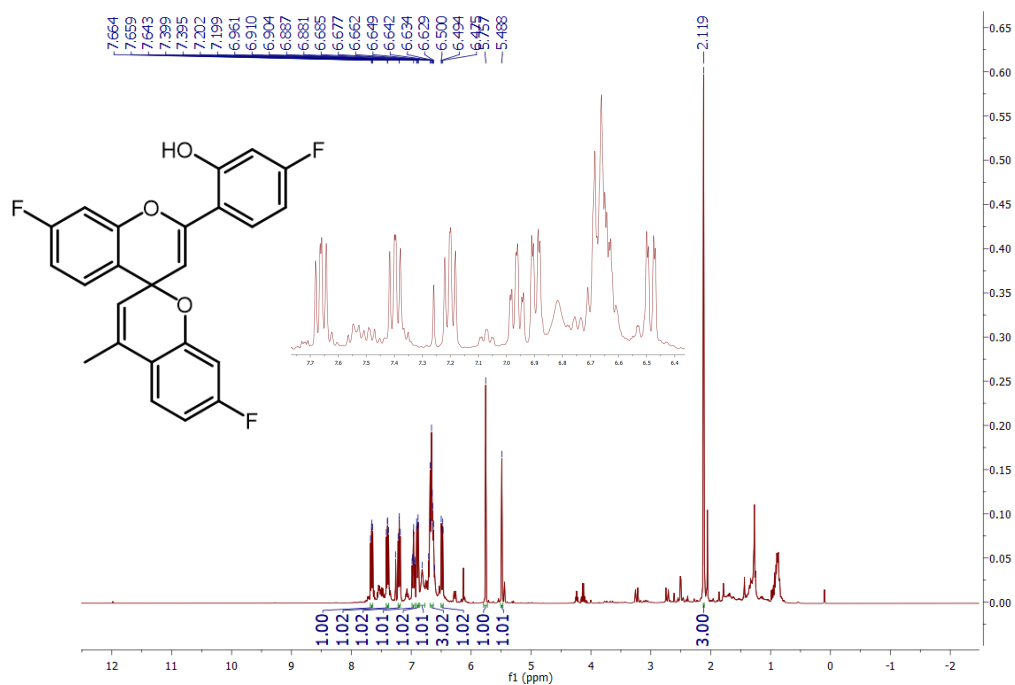

**Figure S6.**  $^1\text{H}$  NMR spectrum (400 MHz, 298 K) of isospiropyran **12** in  $\text{CDCl}_3$ .

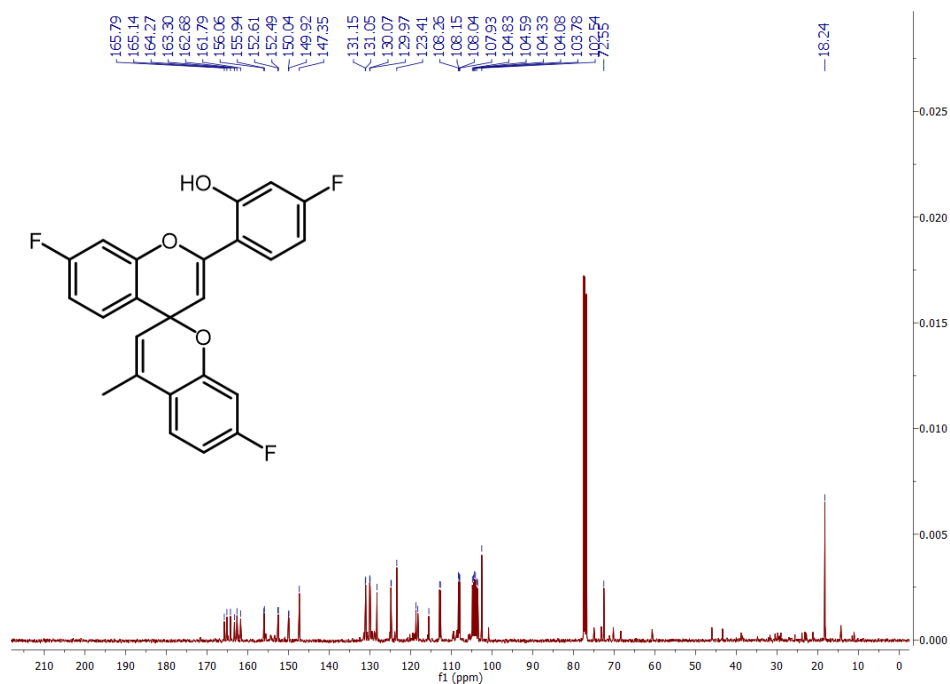

**Figure S7.**  $^{13}\text{C}$  NMR spectrum (100 MHz, 298 K) of isospiropyran **12** in  $\text{CDCl}_3$ .

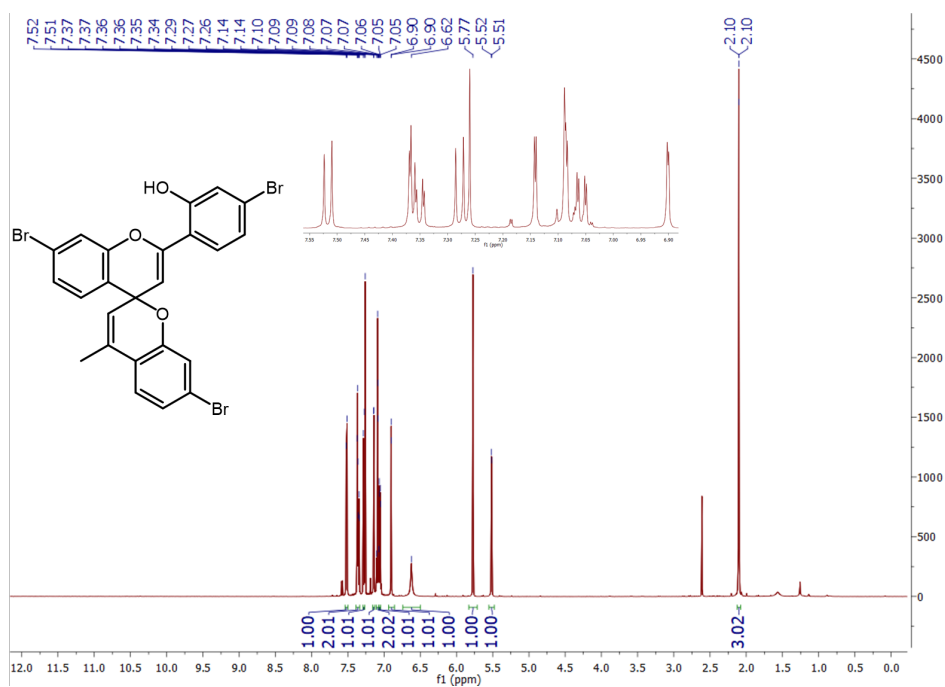

**Figure S8.** <sup>1</sup>H NMR spectrum (600 MHz, 298 K) of isospiropyran **13** in CDCl<sub>3</sub>.

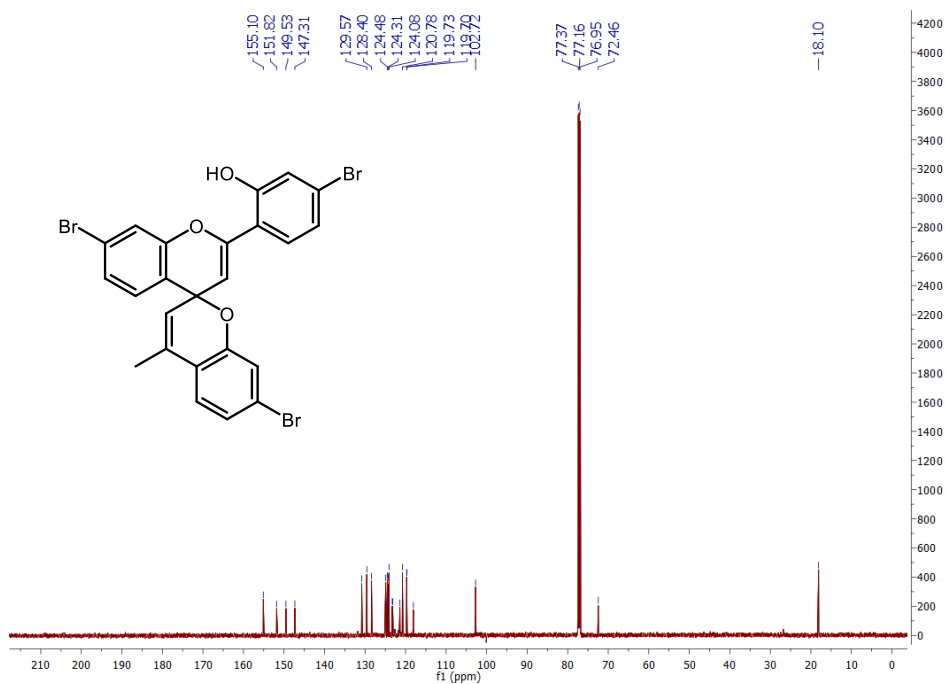

**Figure S9.** <sup>13</sup>C NMR spectrum (150 MHz, 298 K) of isospiropyran **13** in CDCl<sub>3</sub>.

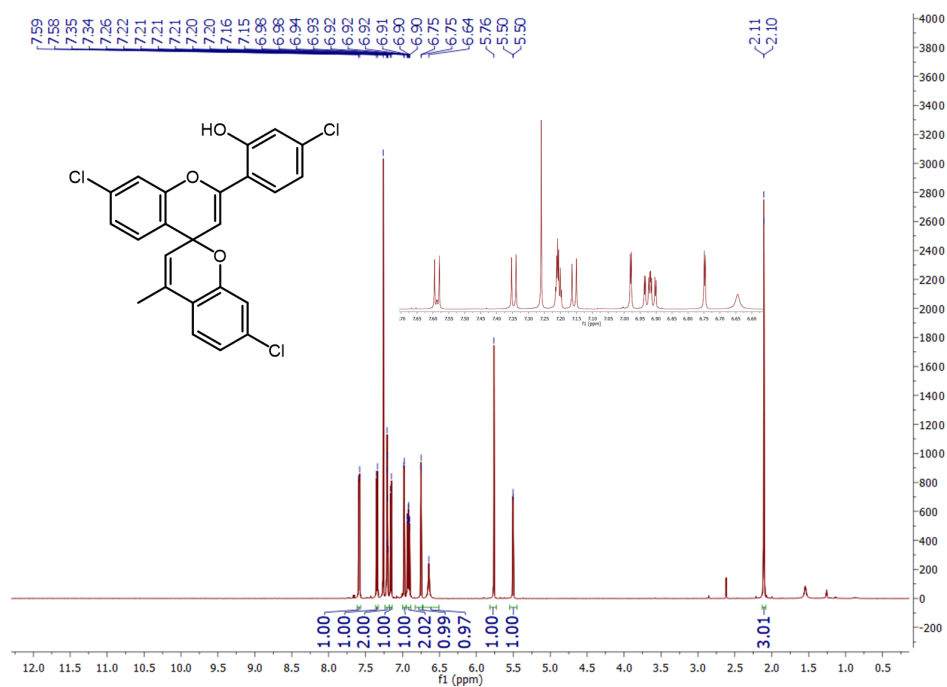

**Figure S10.**  $^1\text{H}$  NMR spectrum (600 MHz, 298 K) of isospiropyran **14** in  $\text{CDCl}_3$ .

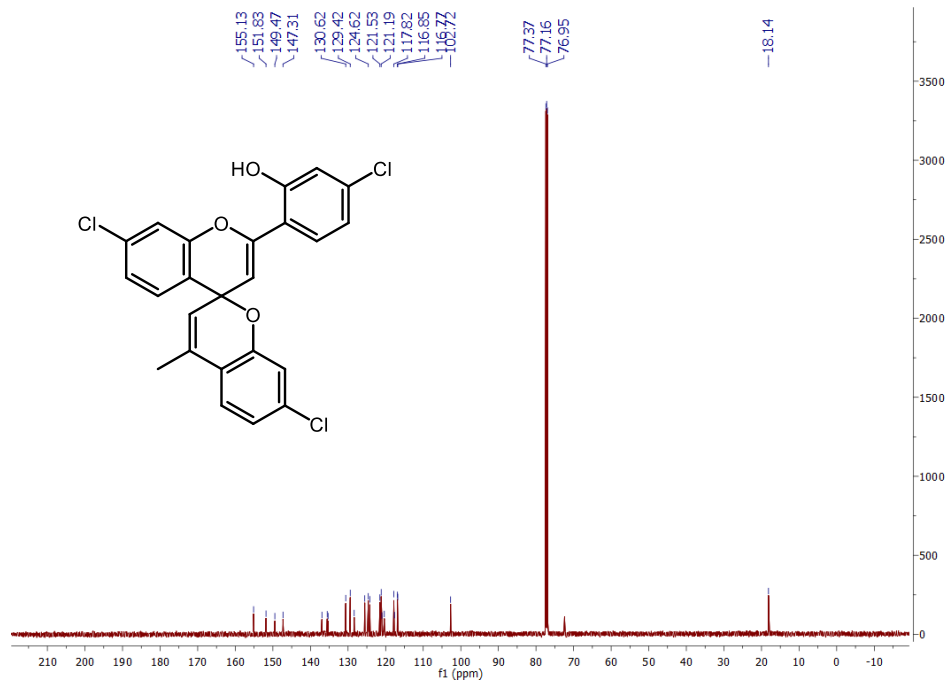

**Figure S11.**  $^{13}\text{C}$  NMR spectrum (150 MHz, 298 K) of isospiropyran **14** in  $\text{CDCl}_3$ .

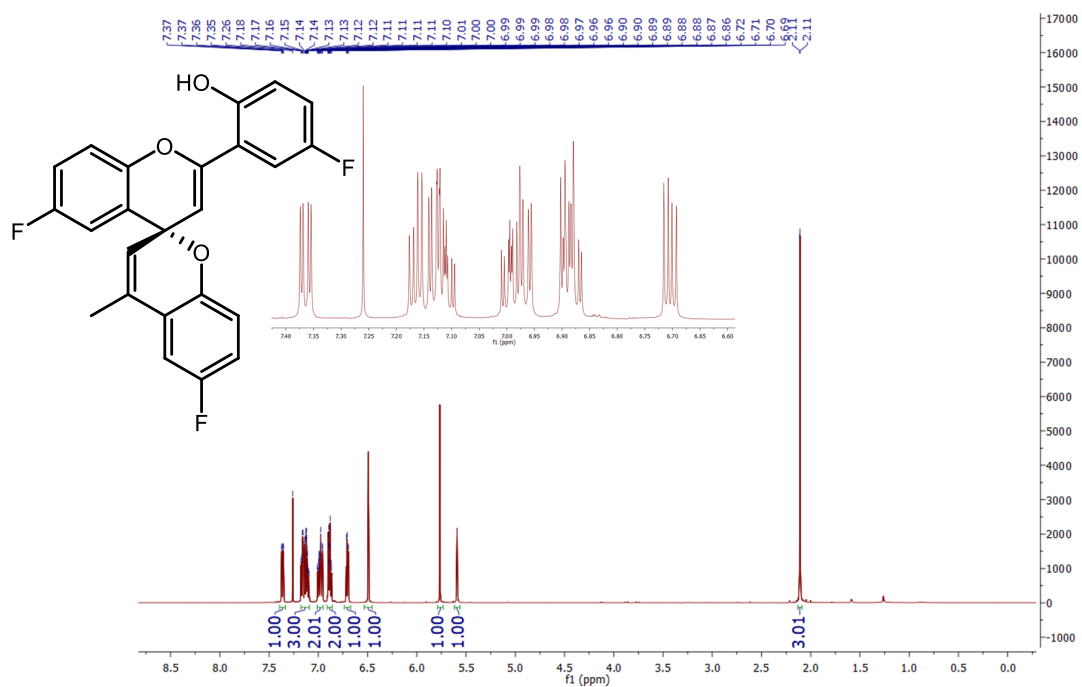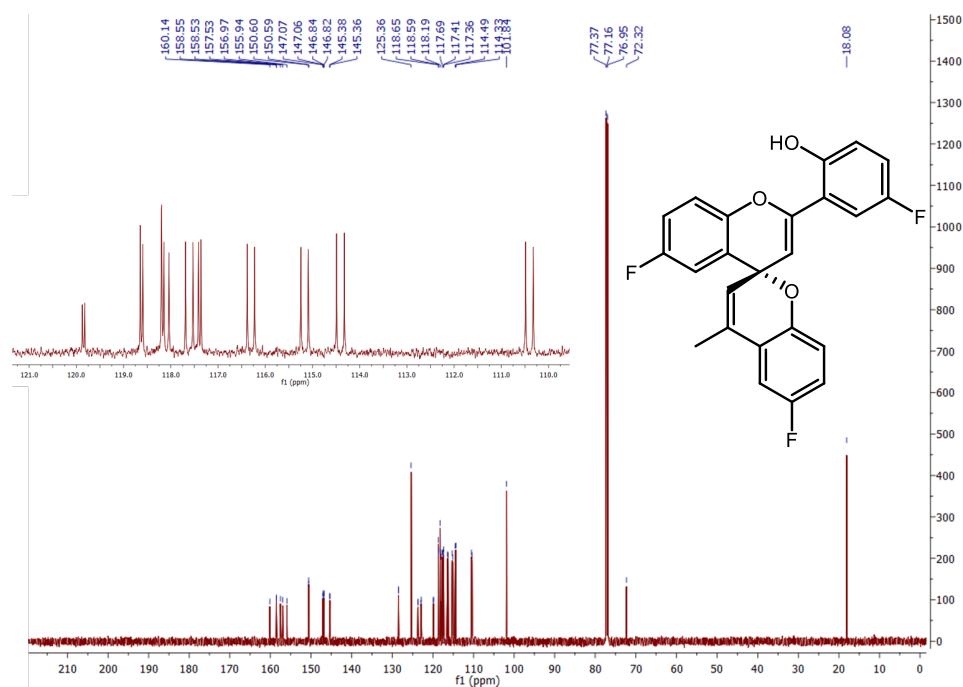

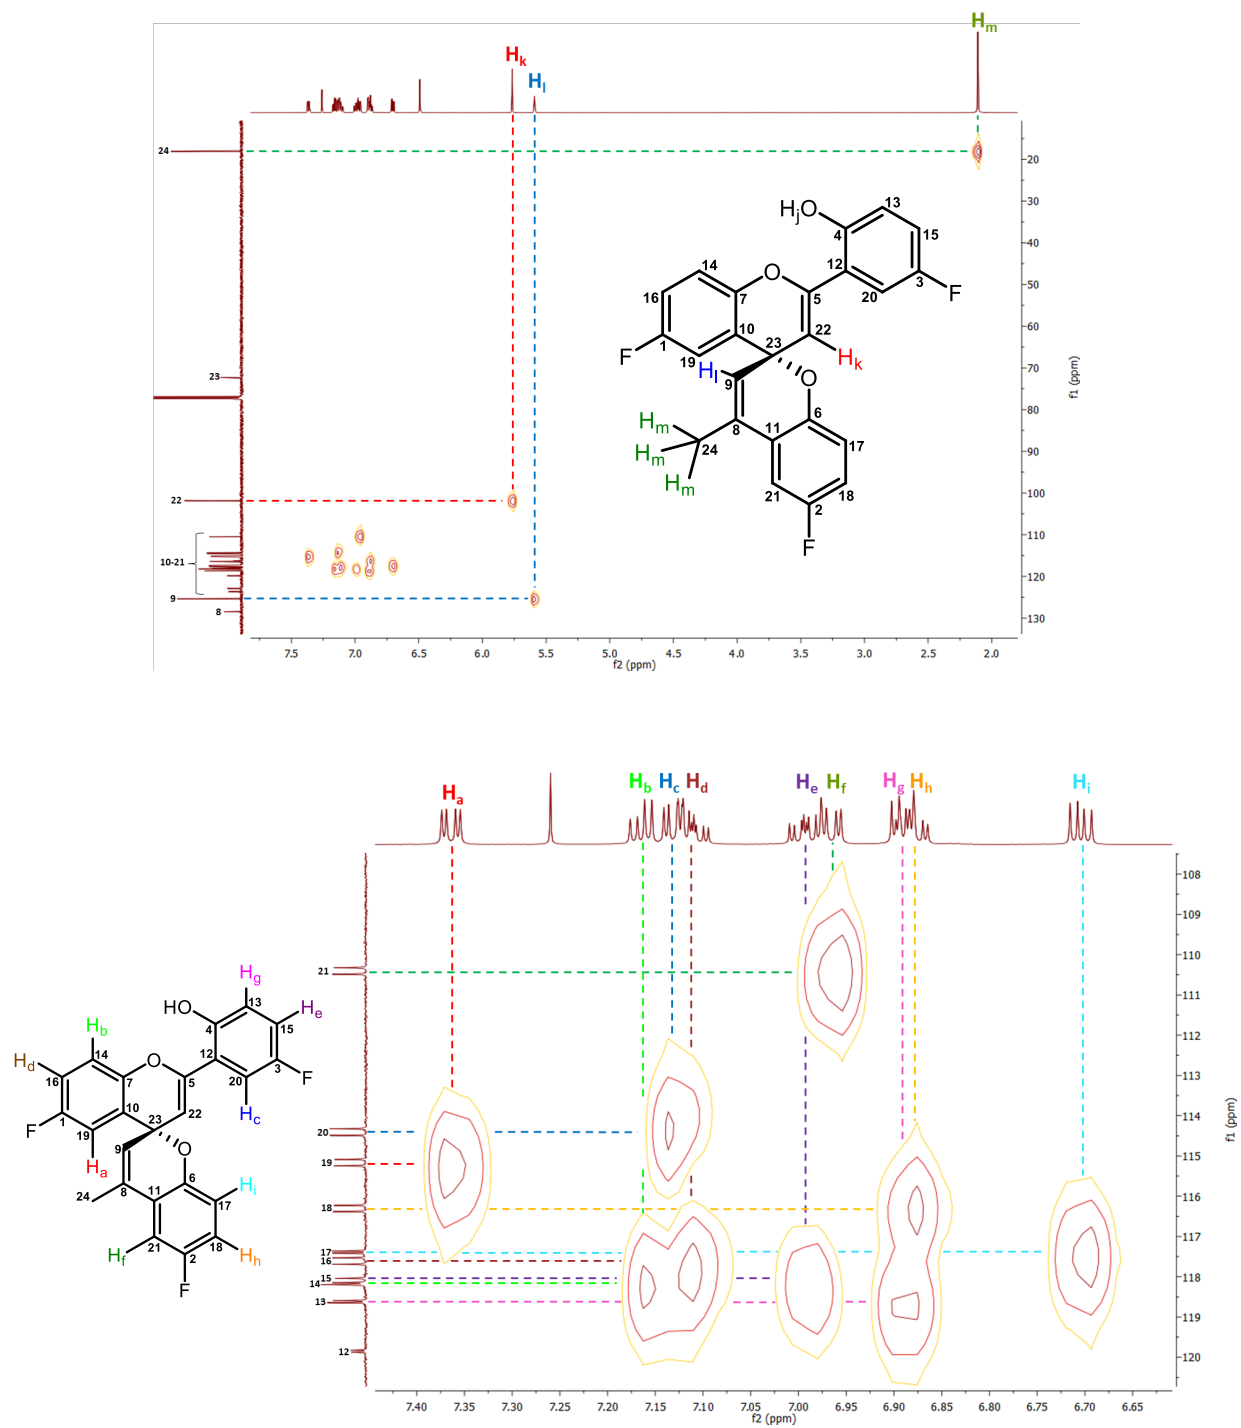

**Figure S14.** Two different regions of  $^1\text{H}$ - $^{13}\text{C}$  HSQC NMR (600 MHz, 298 K) spectrum of isospiropyran **15** in  $\text{CDCl}_3$ .

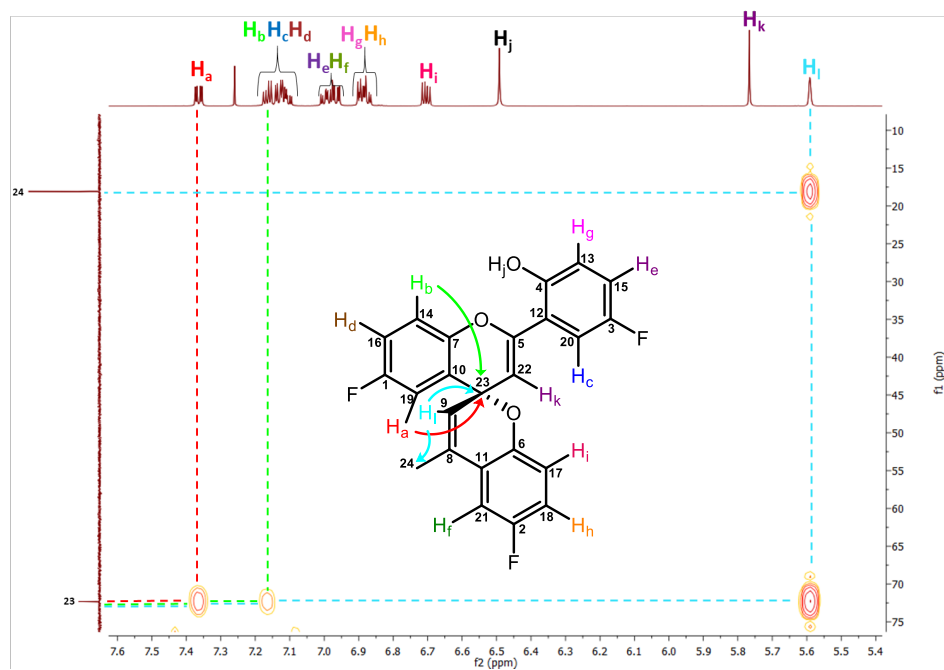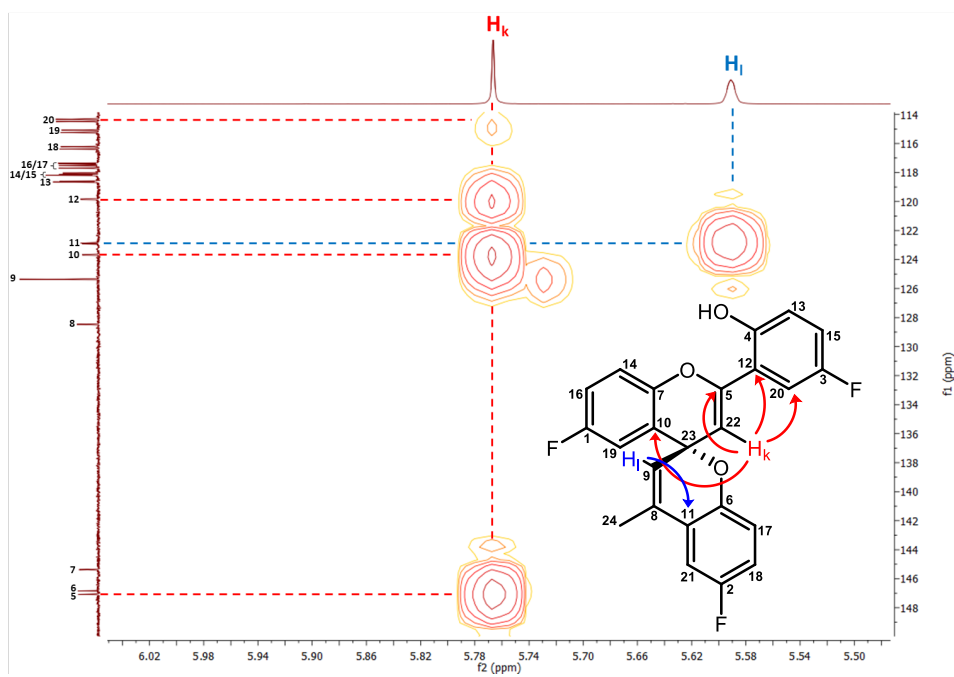



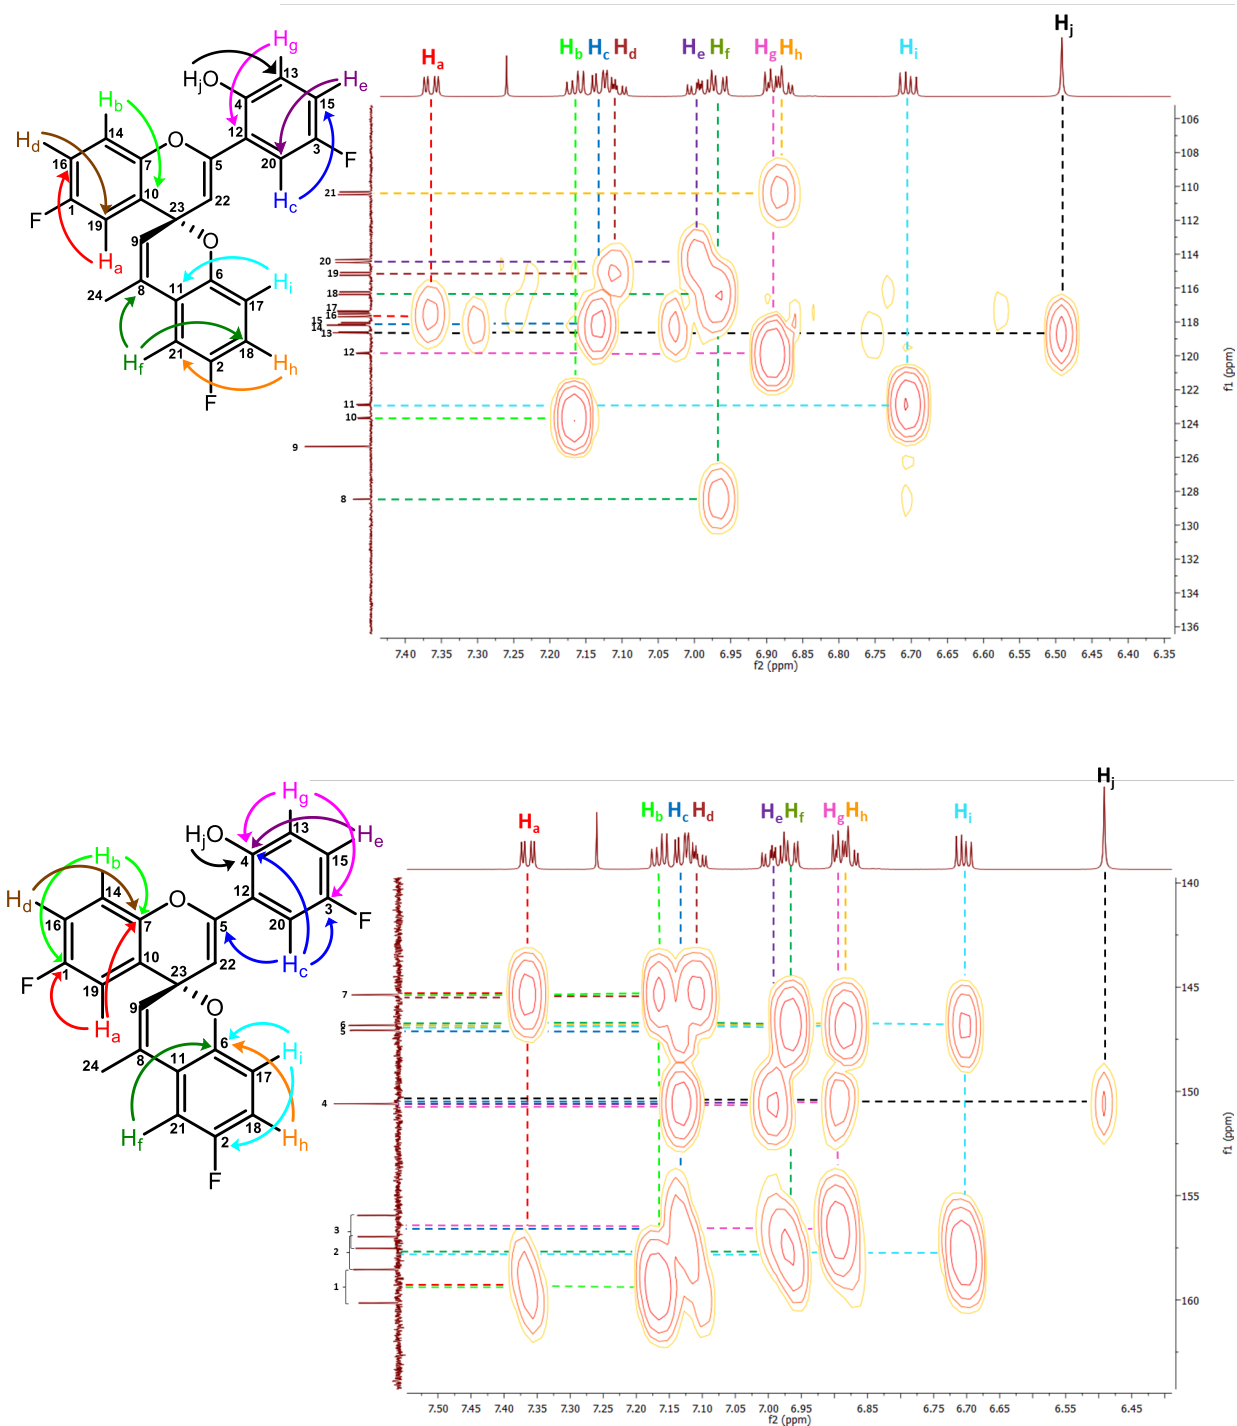

**Figure S15.** Four different regions of  $^1\text{H}$ - $^{13}\text{C}$  HMBC NMR (600 MHz, 298 K) spectrum of isopiripyrane **15** in  $\text{CDCl}_3$ .

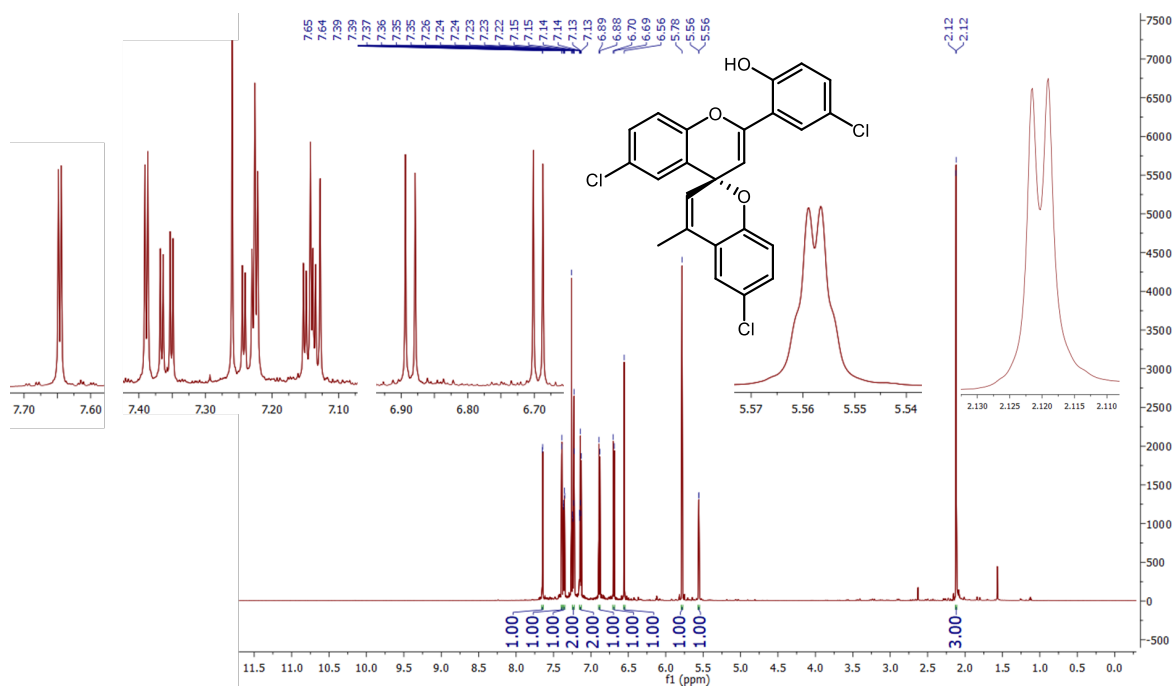

**Figure S16.** <sup>1</sup>H NMR spectrum (600 MHz, 298 K) of isospiropyran **16** in CDCl<sub>3</sub>.

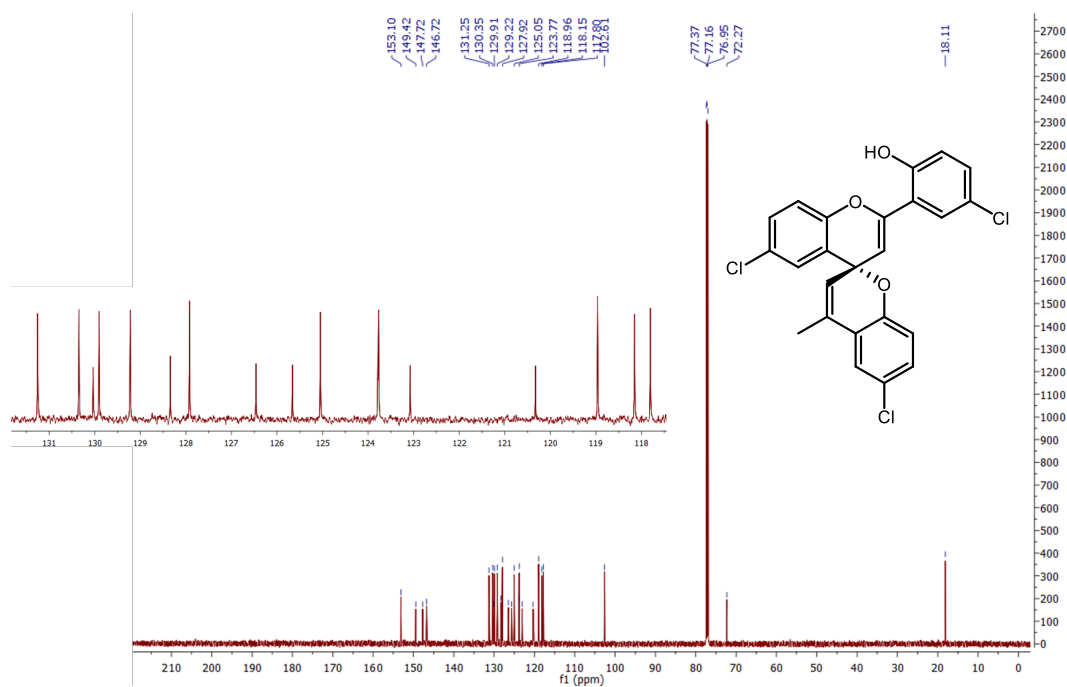

**Figure S17.** <sup>13</sup>C NMR spectrum (150 MHz, 298 K) of isospiropyran **16** in CDCl<sub>3</sub>.

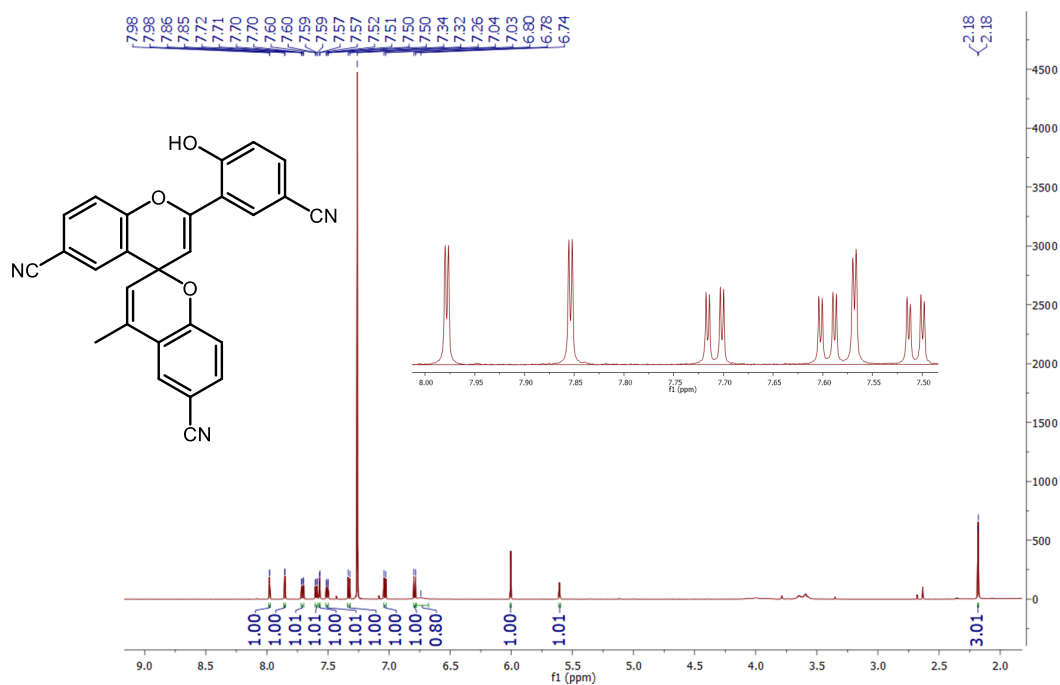

**Figure S18.**  $^1\text{H}$  NMR spectrum (600 MHz, 298 K) of isospiropyran **18** in  $\text{CDCl}_3$ .

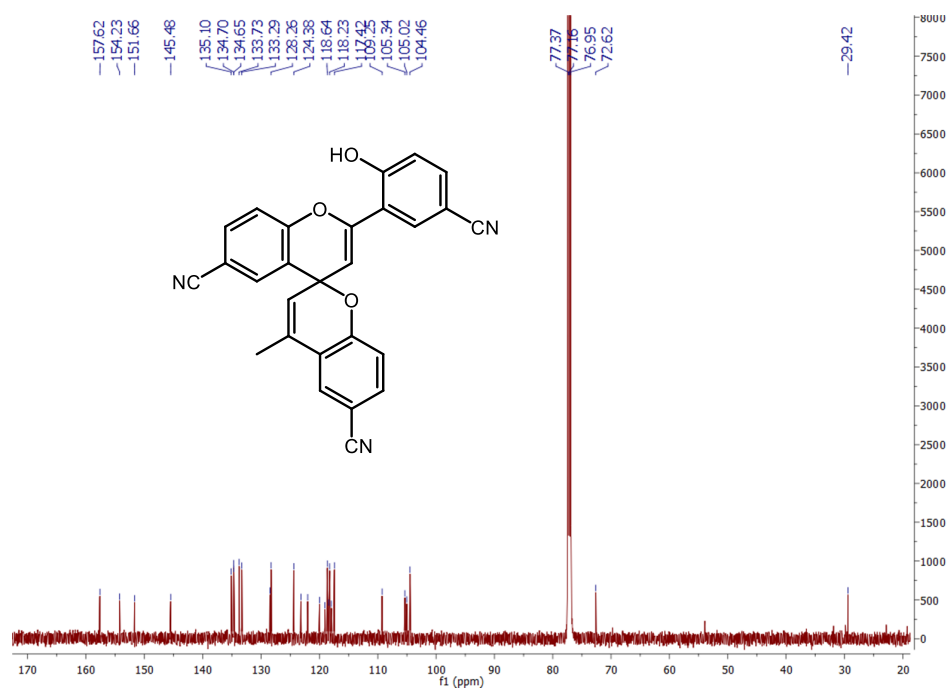

**Figure S19.**  $^{13}\text{C}$  NMR spectrum (150 MHz, 298 K) of isospiropyran **18** in  $\text{CDCl}_3$ .

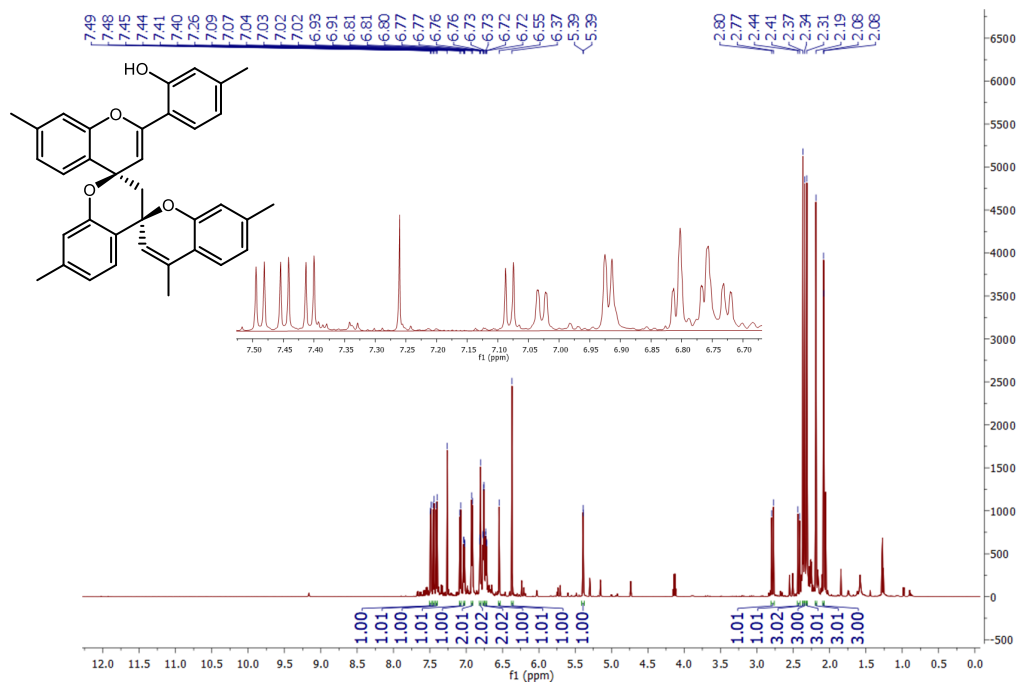

**Figure S20.**  $^1\text{H}$  NMR spectrum (600 MHz, 298 K) of compound **30** in  $\text{CDCl}_3$ .

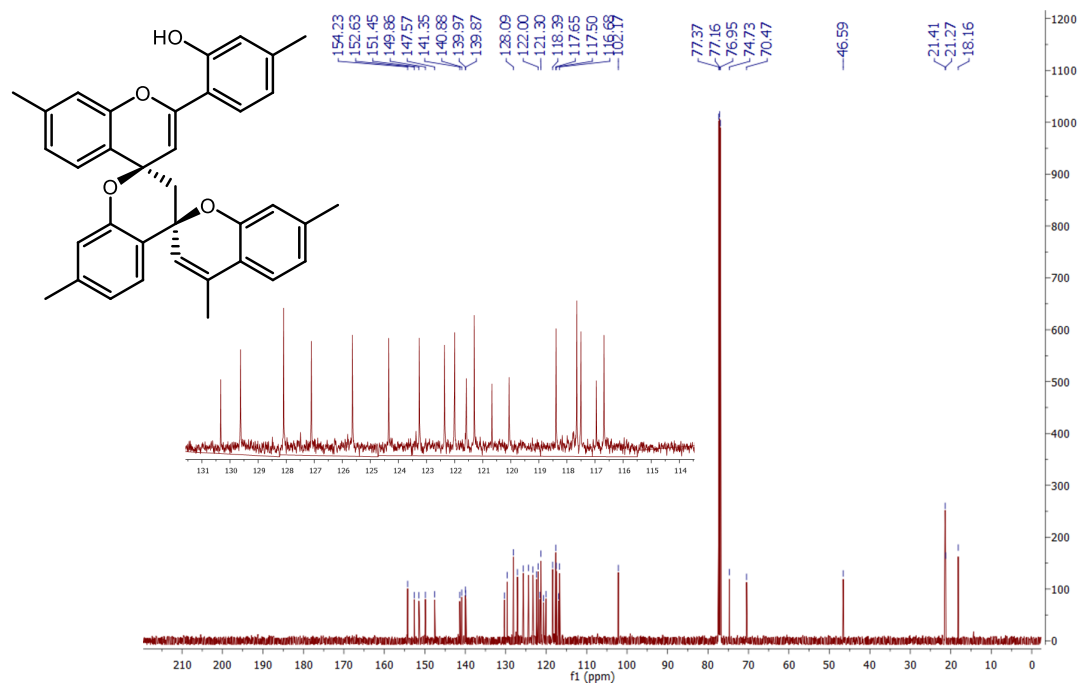

**Figure S21.**  $^{13}\text{C}$  NMR spectrum (150 MHz, 298 K) of compound **30** in  $\text{CDCl}_3$ .

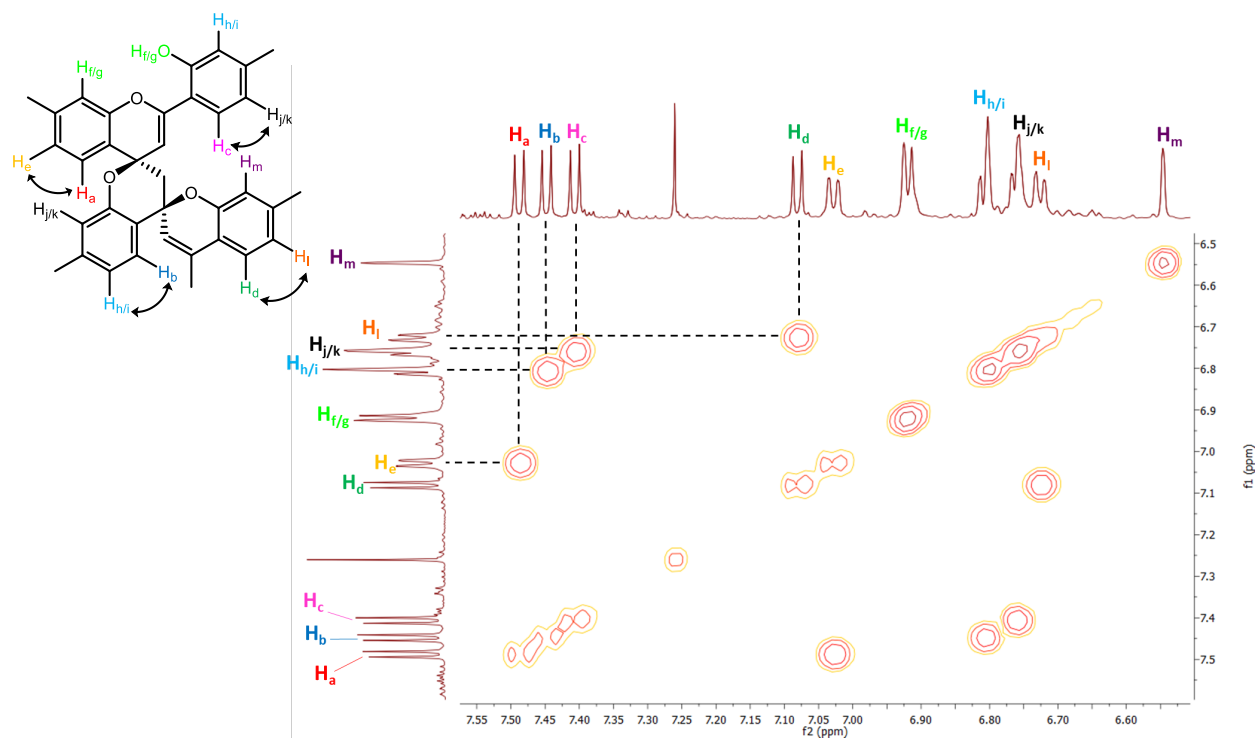

**Figure S22.**  $^1\text{H}$ - $^1\text{H}$  COSY NMR (600 MHz, 298 K) spectrum of compound **30** in  $\text{CDCl}_3$ .

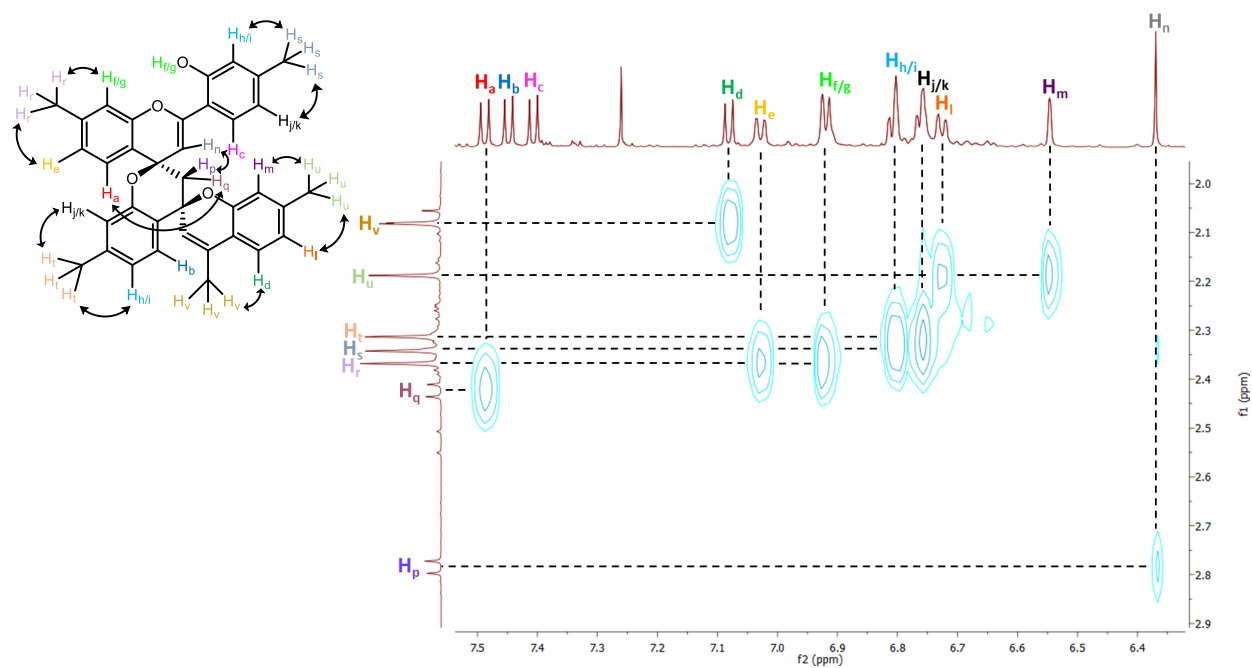

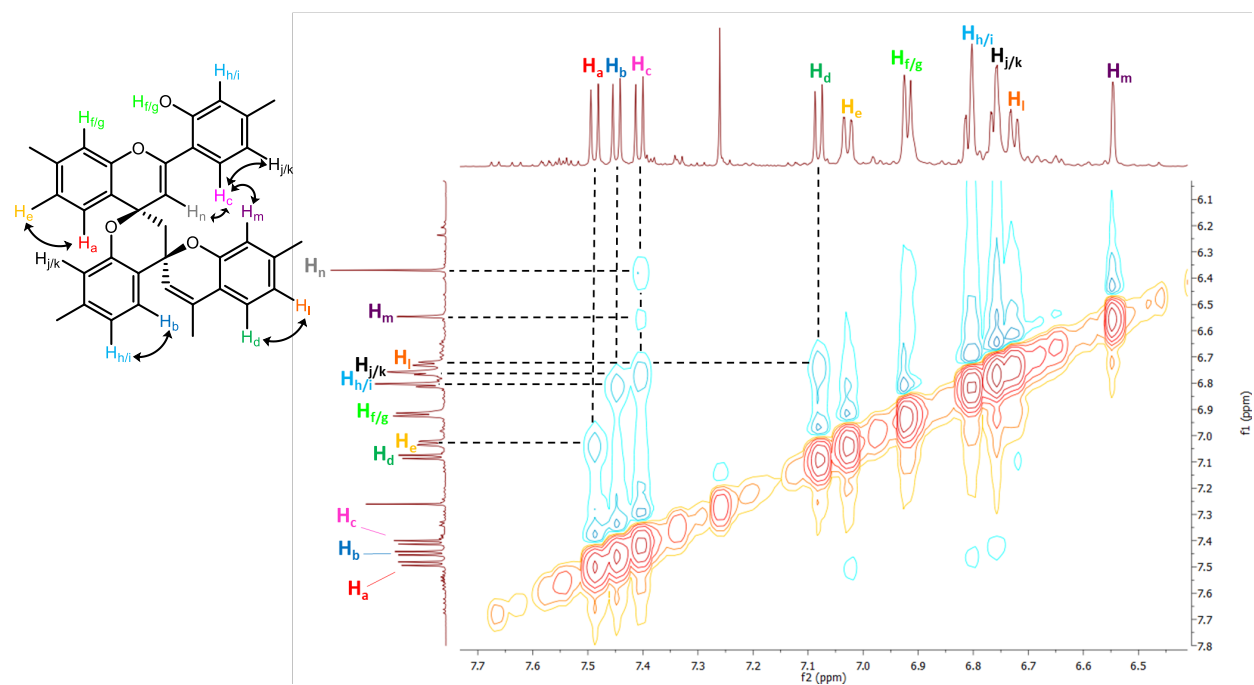

**Figure S23.** Two different regions of  $^1\text{H}$ - $^1\text{H}$  NOESY NMR (600 MHz, 298 K) spectrum of tetramer **30** in  $\text{CDCl}_3$ .

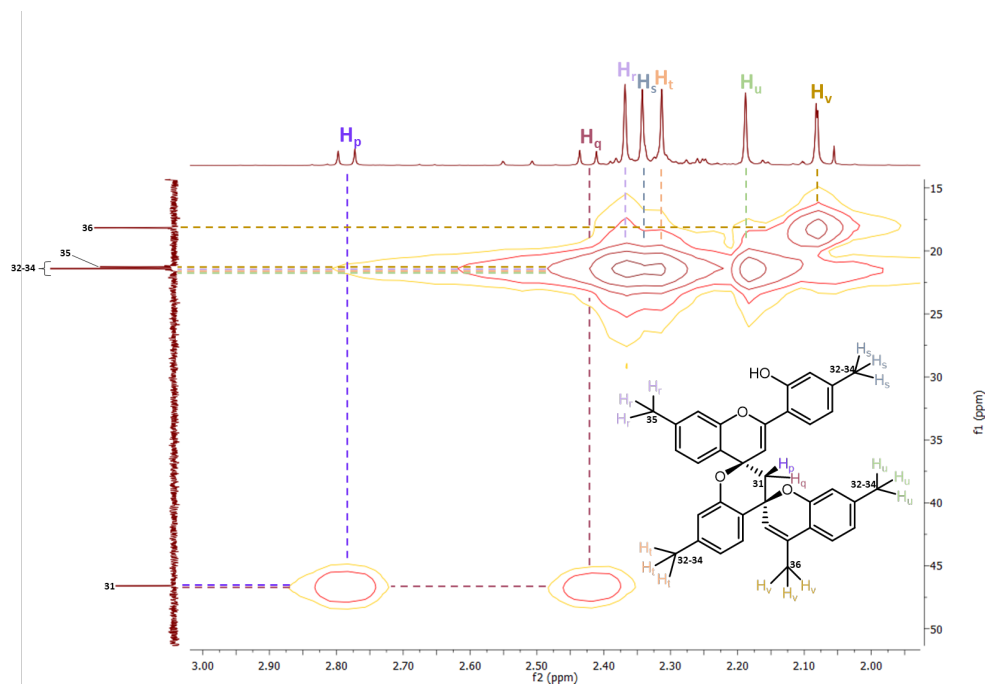

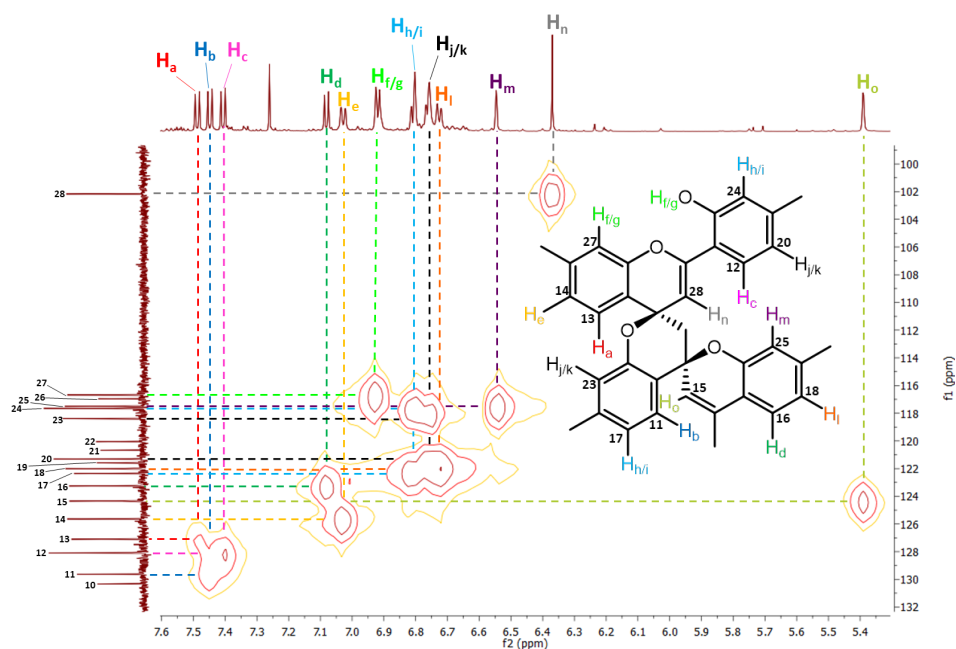

**Figure S24.** Two different regions of  $^1\text{H}$ - $^{13}\text{C}$  HSQC NMR (600 MHz, 298 K) spectrum of tetramer **30** in  $\text{CDCl}_3$ .

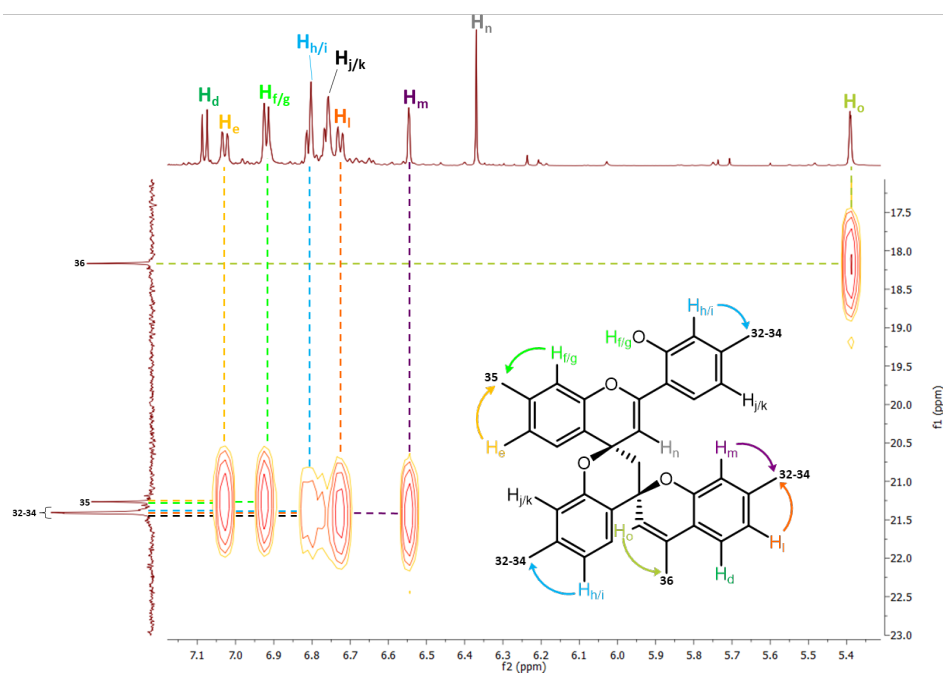

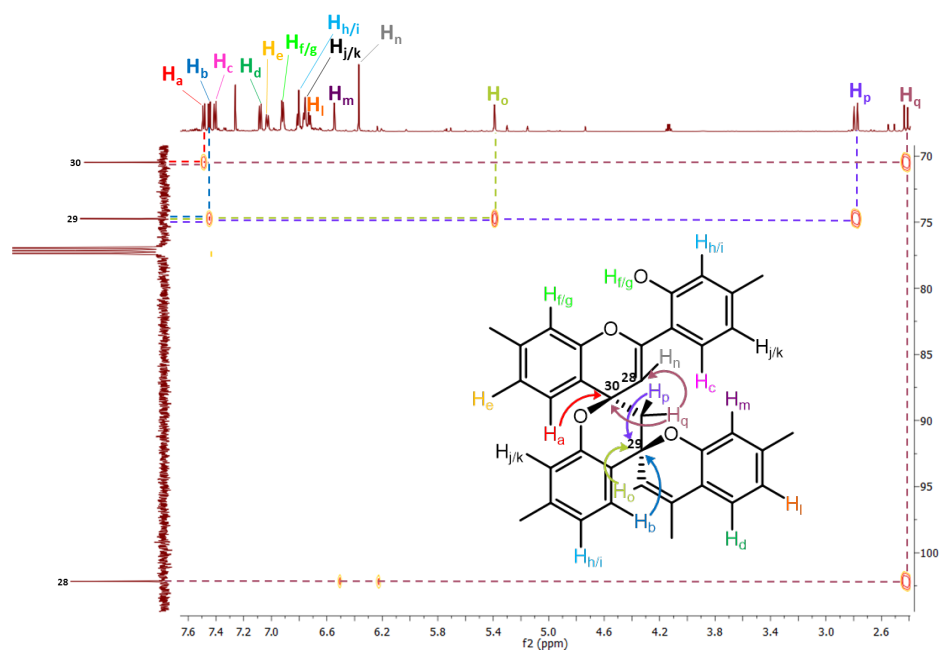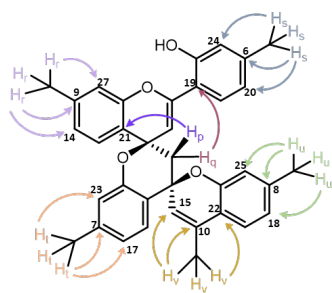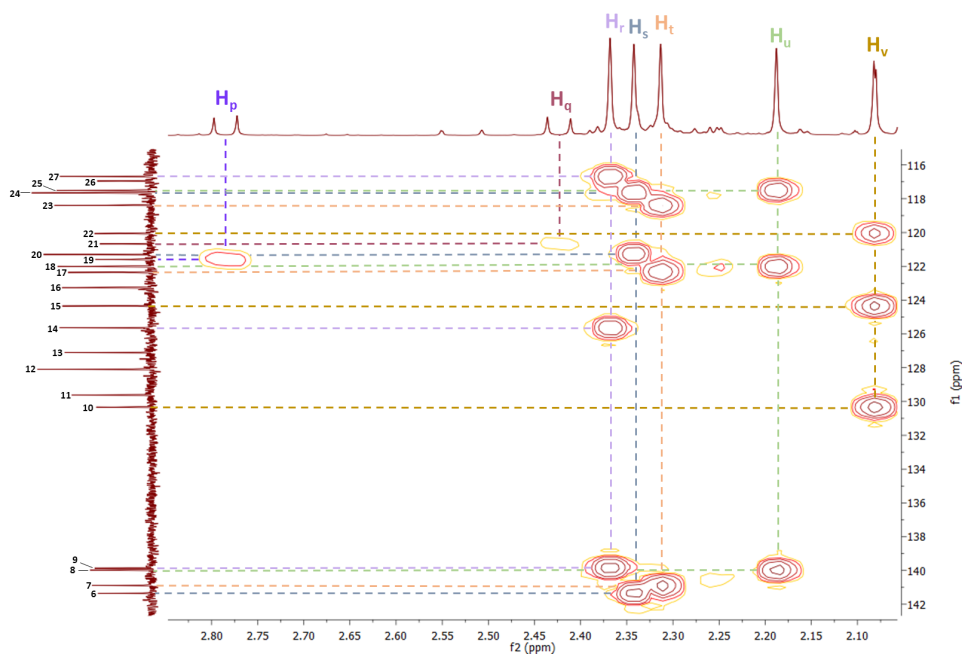



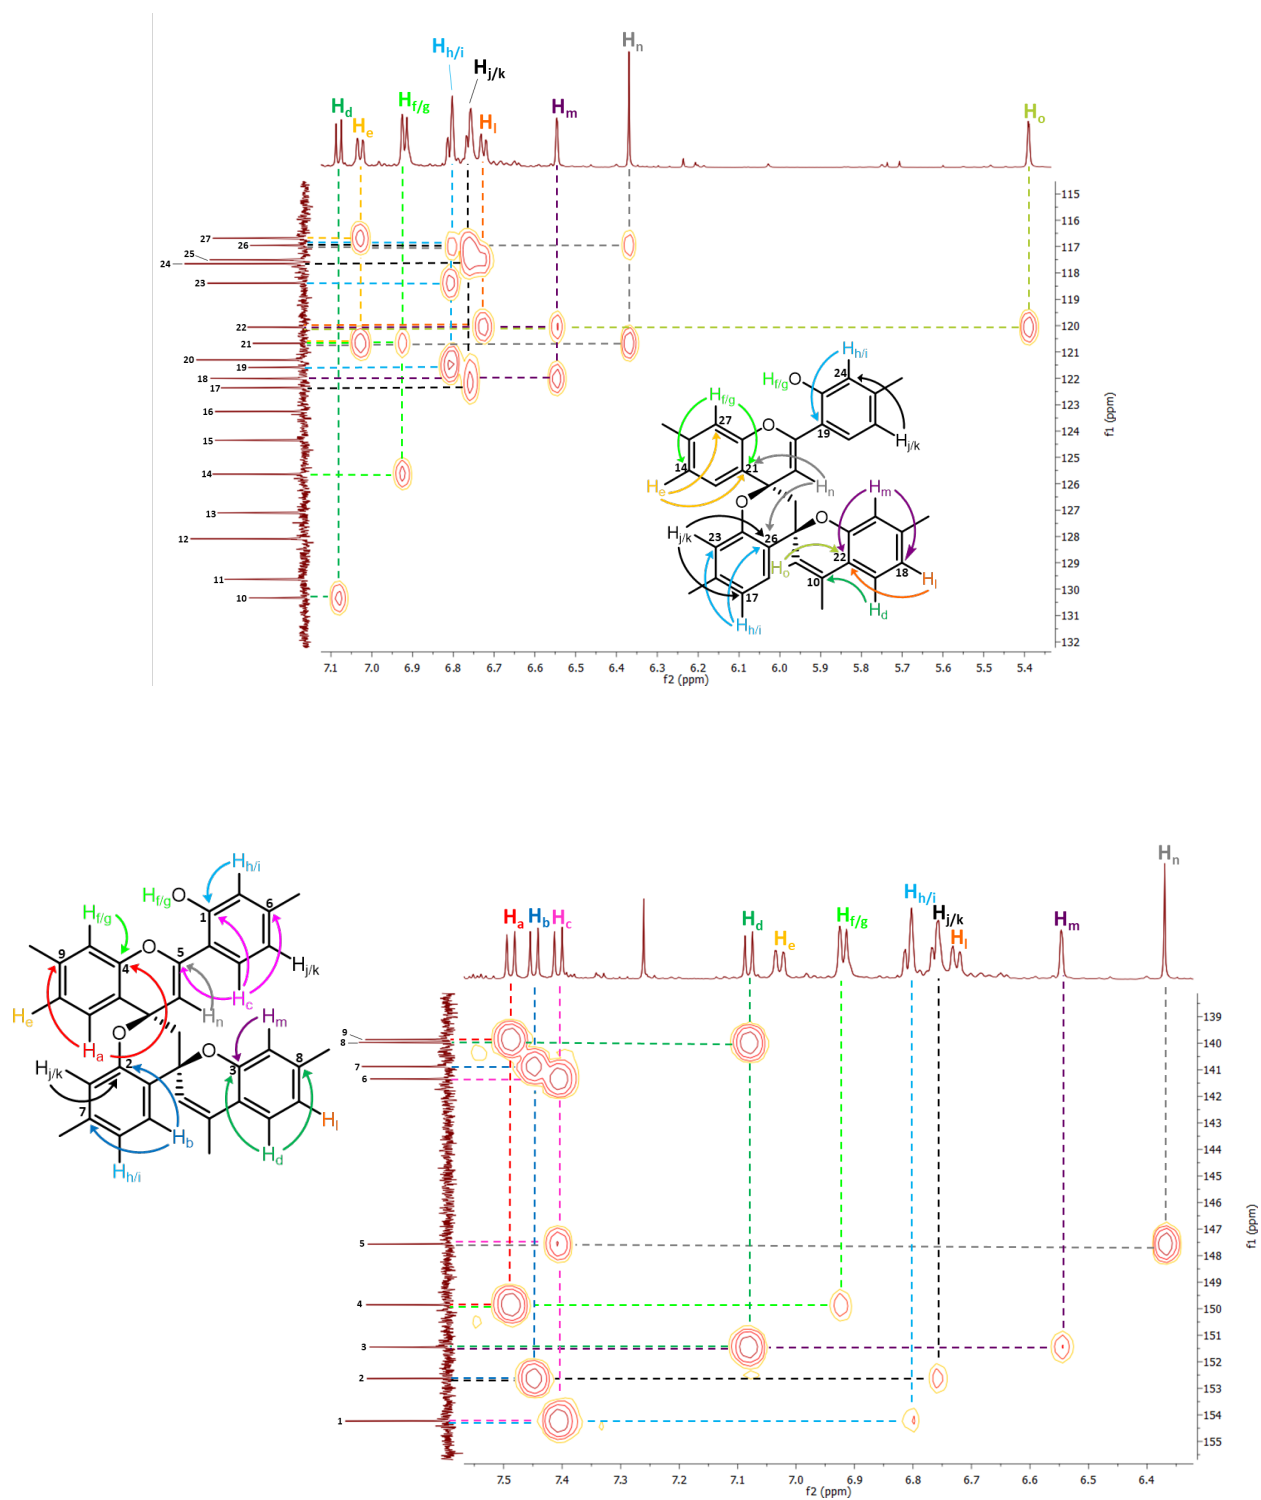

**Figure S25.** Five different regions of  $^1\text{H}$ - $^{13}\text{C}$  HMBC NMR (600 MHz, 298 K) spectrum of tetramer **30** in  $\text{CDCl}_3$ .

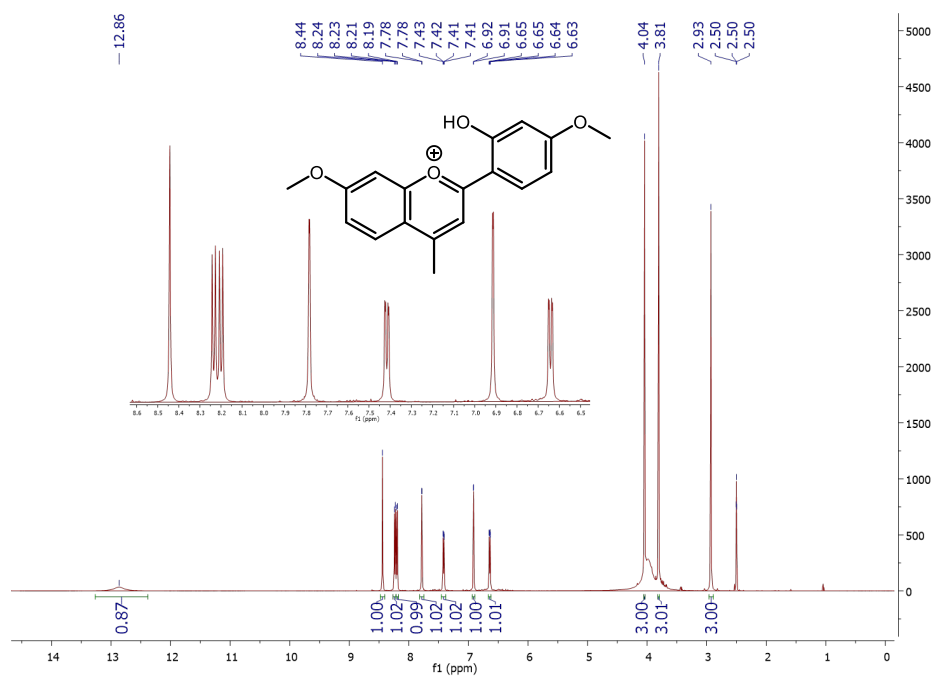

**Figure S26.** <sup>1</sup>H NMR spectrum (600 MHz, 298 K) of anthocyanidin **31** in *d*<sub>6</sub>-DMSO.

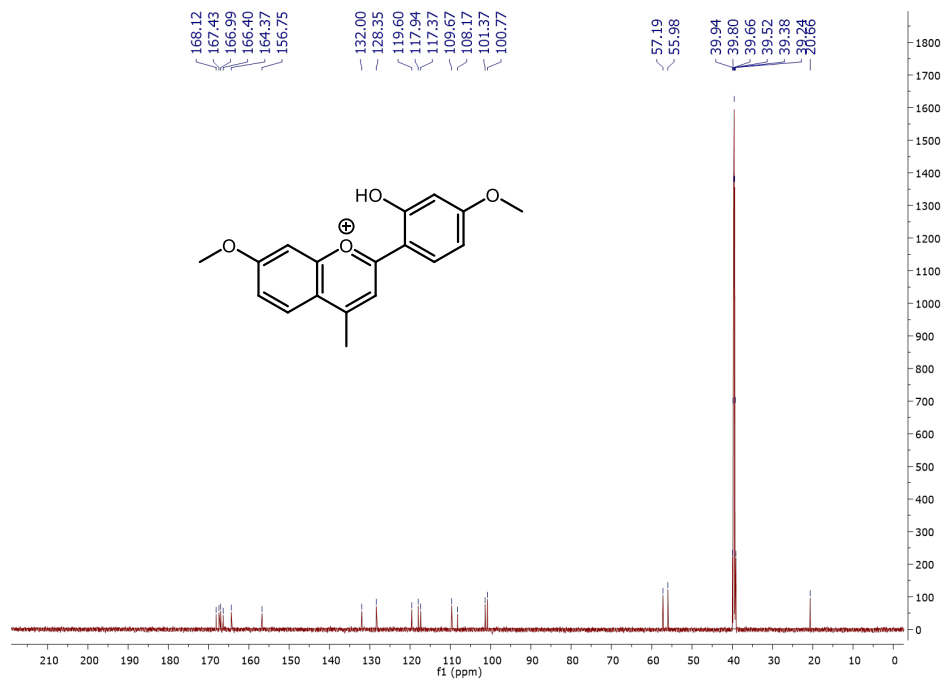

**Figure S27.** <sup>13</sup>C NMR spectrum (150 MHz, 298 K) of anthocyanidin **31** in *d*<sub>6</sub>-DMSO.

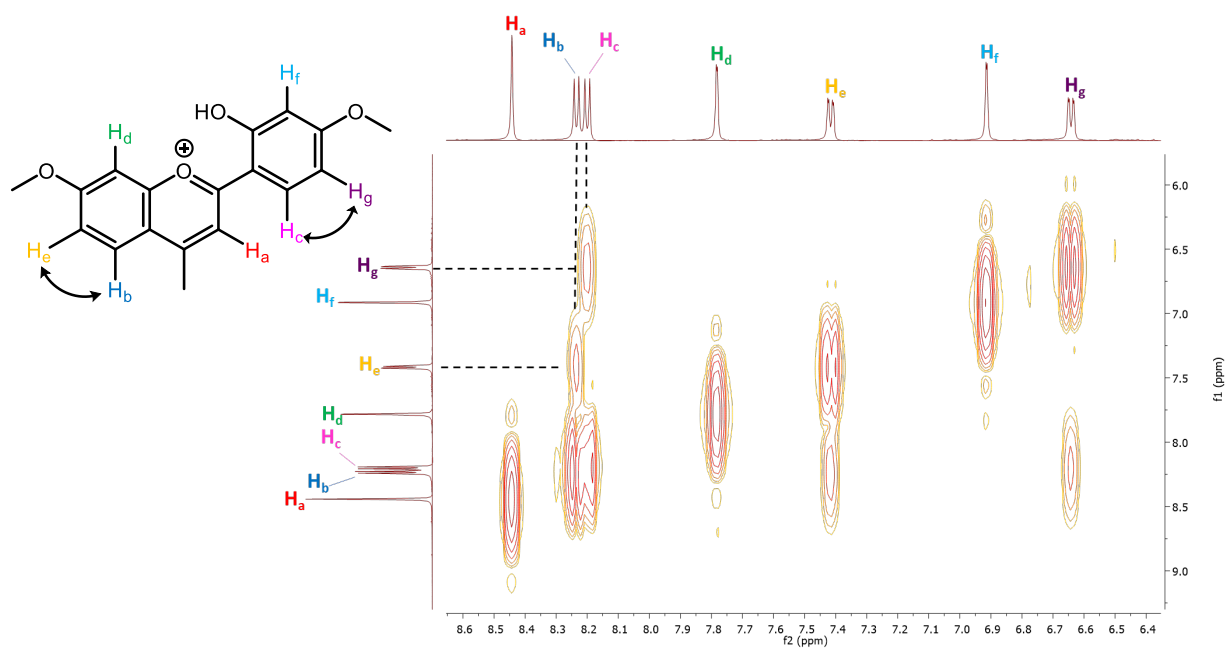

**Figure S28.**  $^1\text{H}$ - $^1\text{H}$  COSY NMR (600 MHz, 298 K) spectrum of anthocyanidin **31** in  $d_6$ -DMSO.

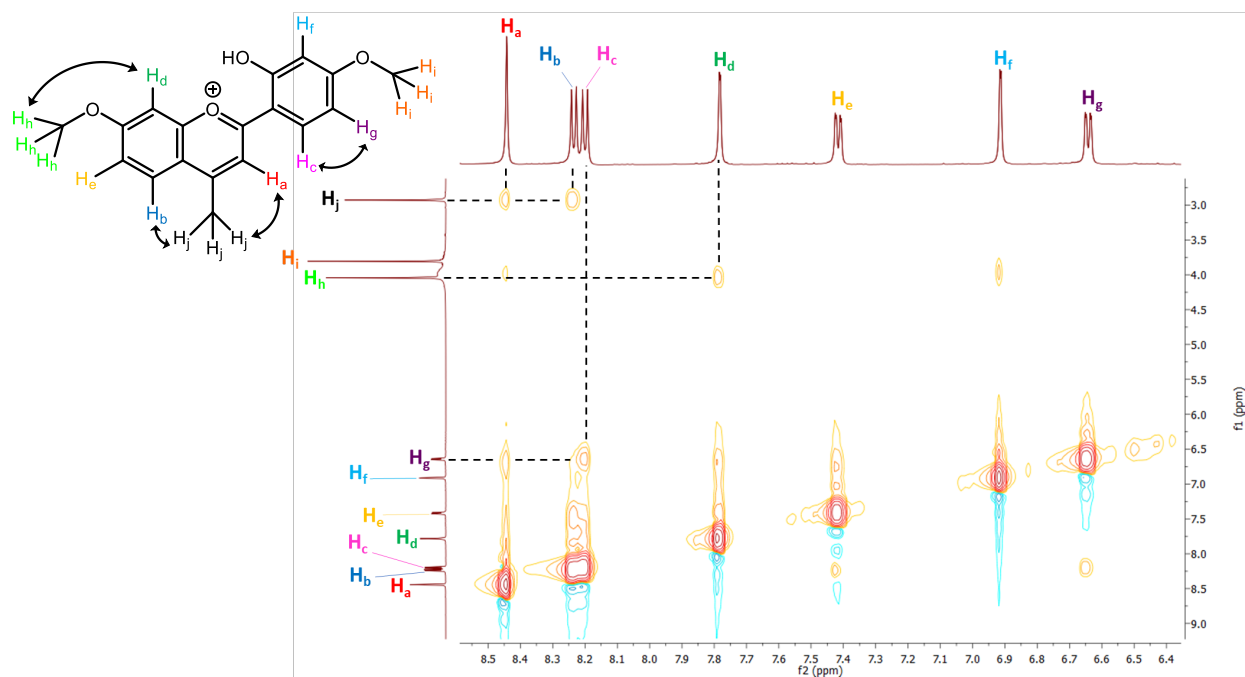

**Figure S29.**  $^1\text{H}$ - $^1\text{H}$  NOESY NMR (600 MHz, 298 K) spectrum of anthocyanidin **31** in  $d_6$ -DMSO.

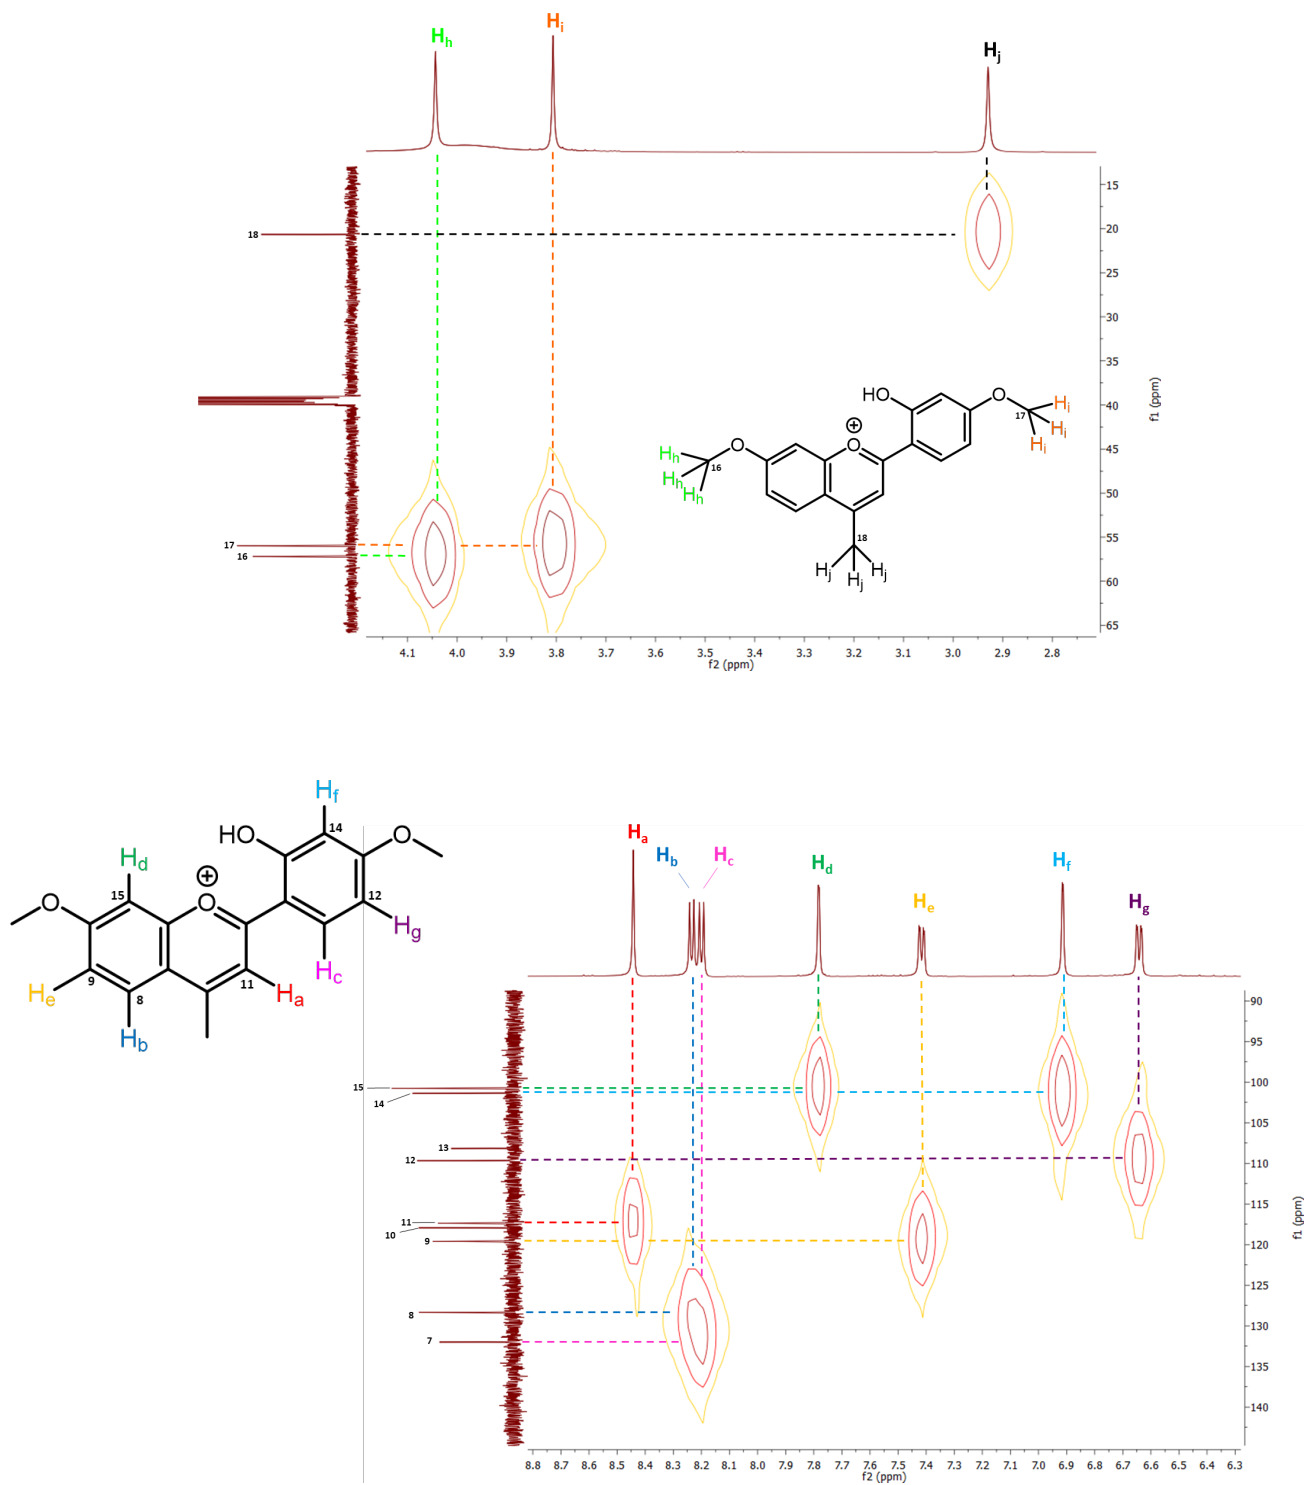

**Figure S30.** Two different regions of  $^1\text{H}$ - $^{13}\text{C}$  HSQC NMR (600 MHz, 298 K) spectrum of anthocyanidin **31** in  $d_6$ -DMSO.

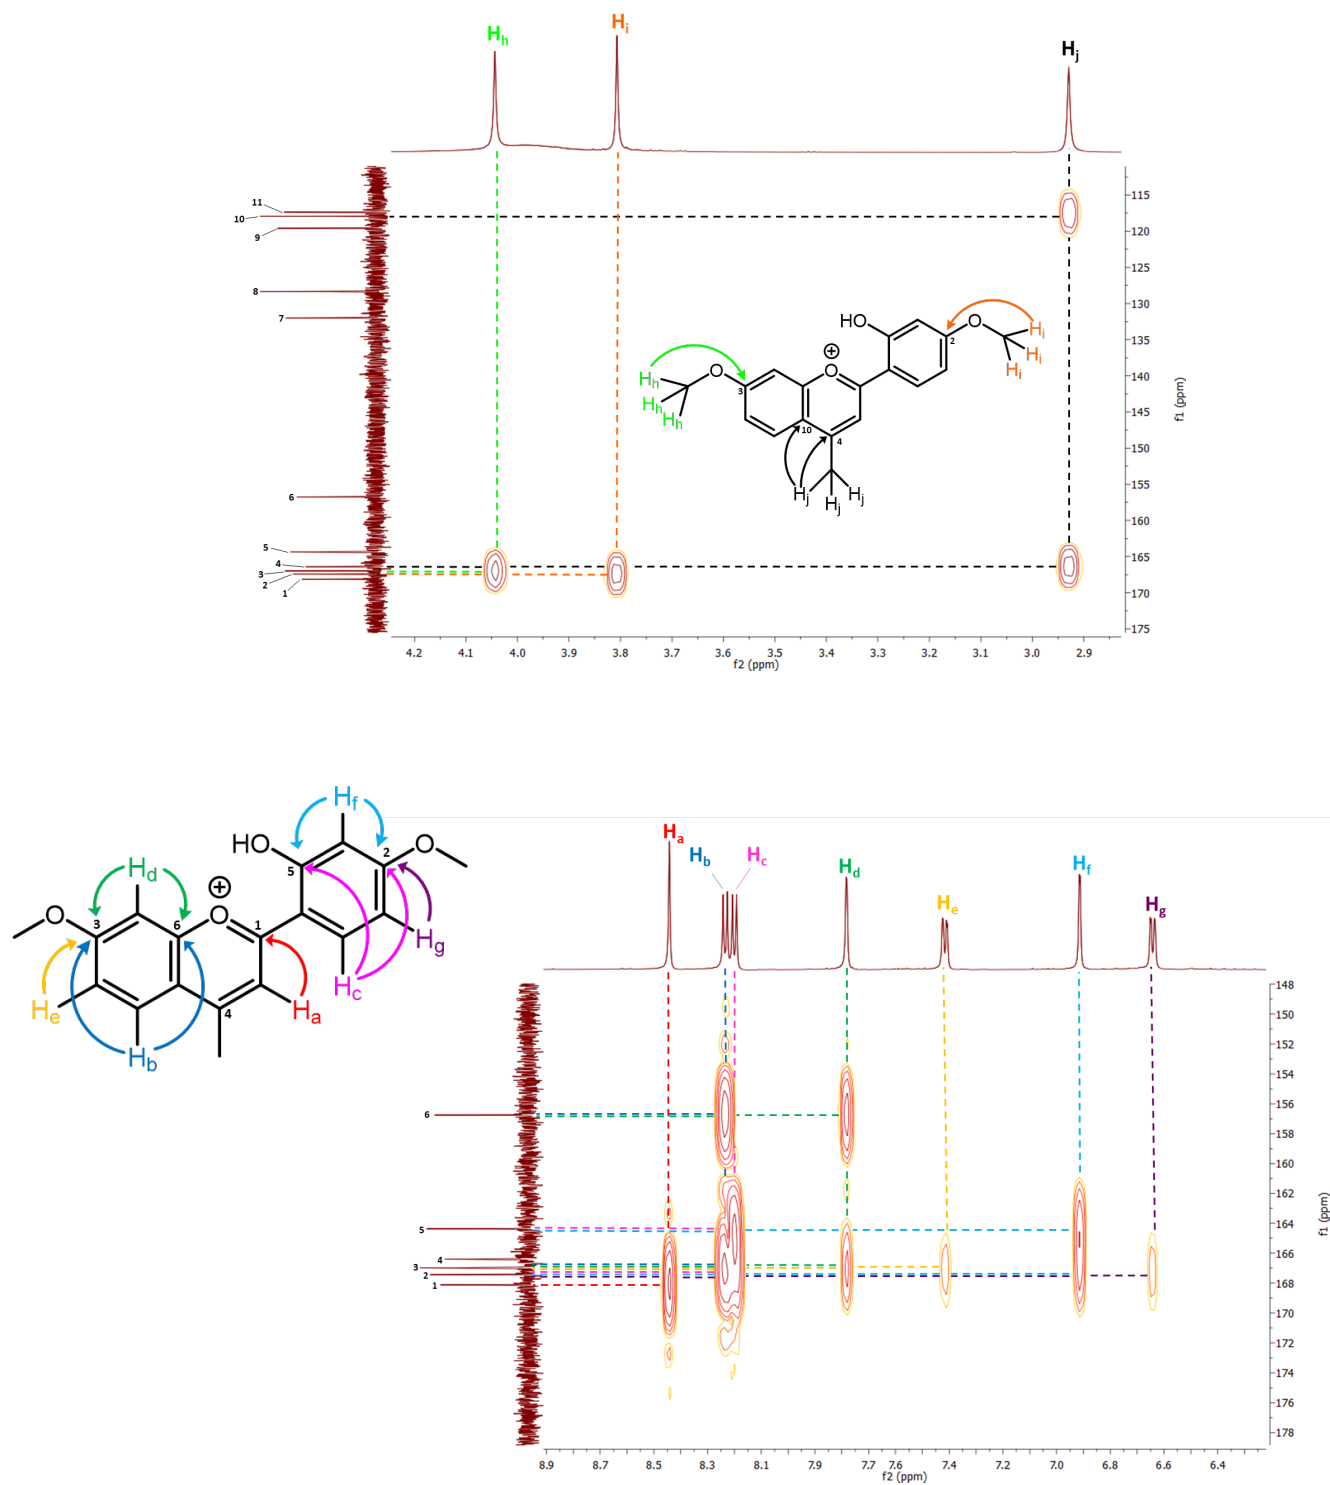

**Figure S31.** Two different regions of  $^1\text{H}$ - $^{13}\text{C}$  HMBC NMR (600 MHz, 298 K) spectrum of anthocyanidin **31** in  $d_6$ -DMSO.

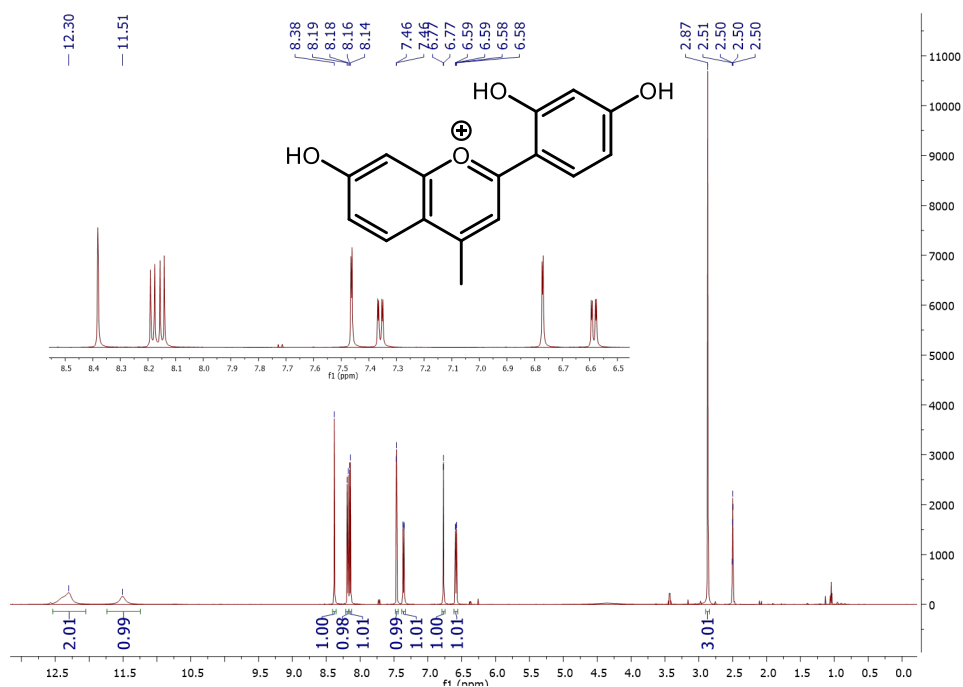

**Figure S32.**  $^1\text{H}$  NMR spectrum (600 MHz, 298 K) of anthocyanidin **32** in  $d_6$ -DMSO.

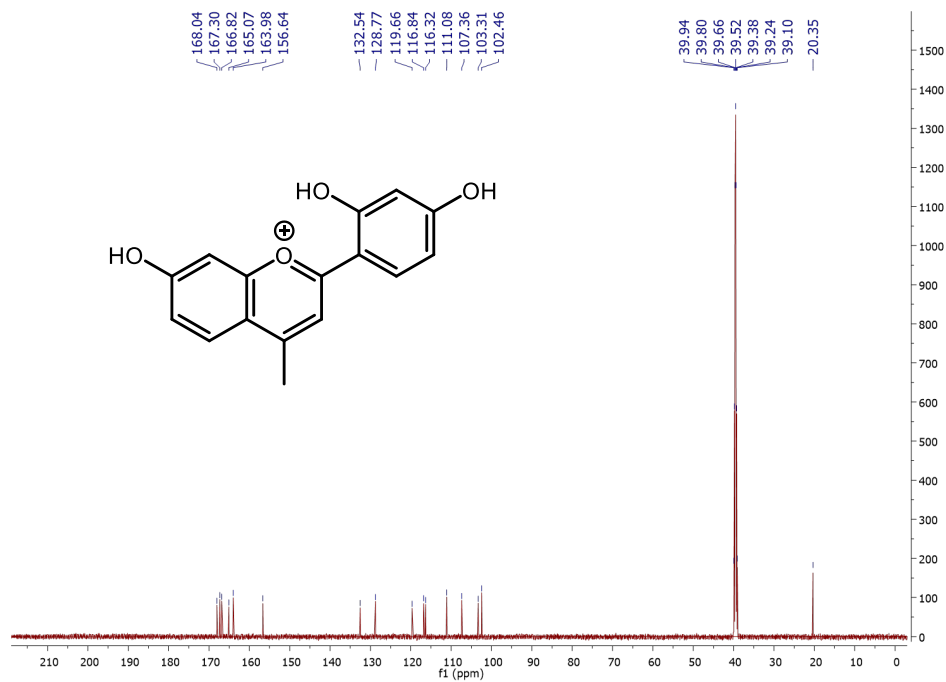

**Figure S33.**  $^{13}\text{C}$  NMR spectrum (150 MHz, 298 K) of anthocyanidin **32** in  $d_6$ -DMSO.

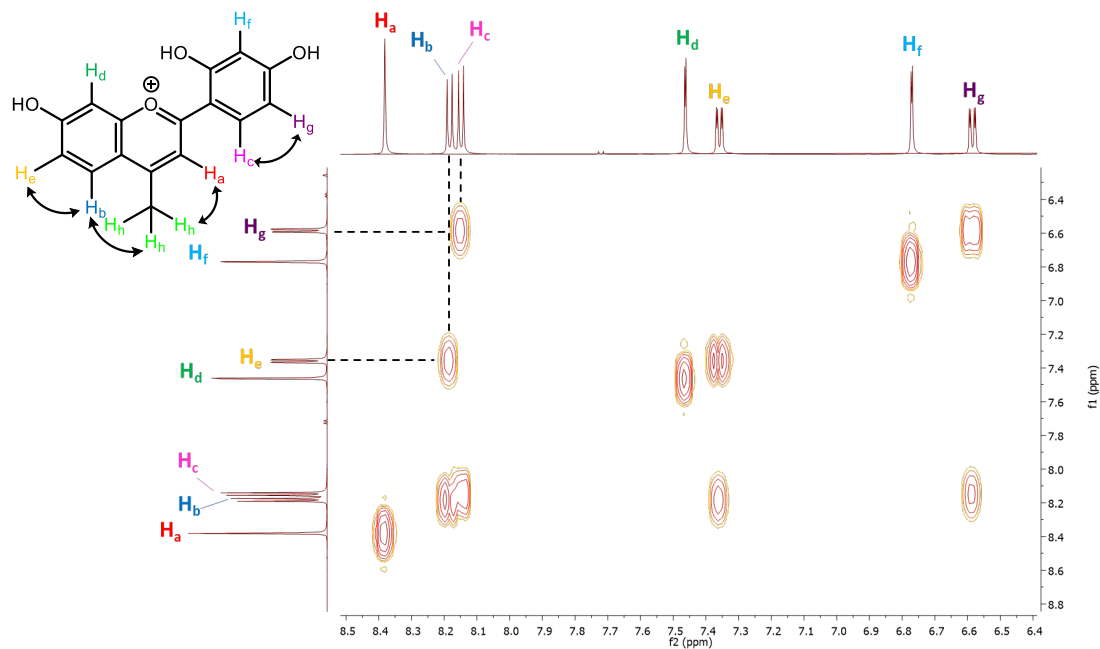

**Figure S34.**  $^1\text{H}$ - $^1\text{H}$  COSY NMR (600 MHz, 298 K) spectrum of anthocyanidin **32** in  $d_6$ -DMSO.

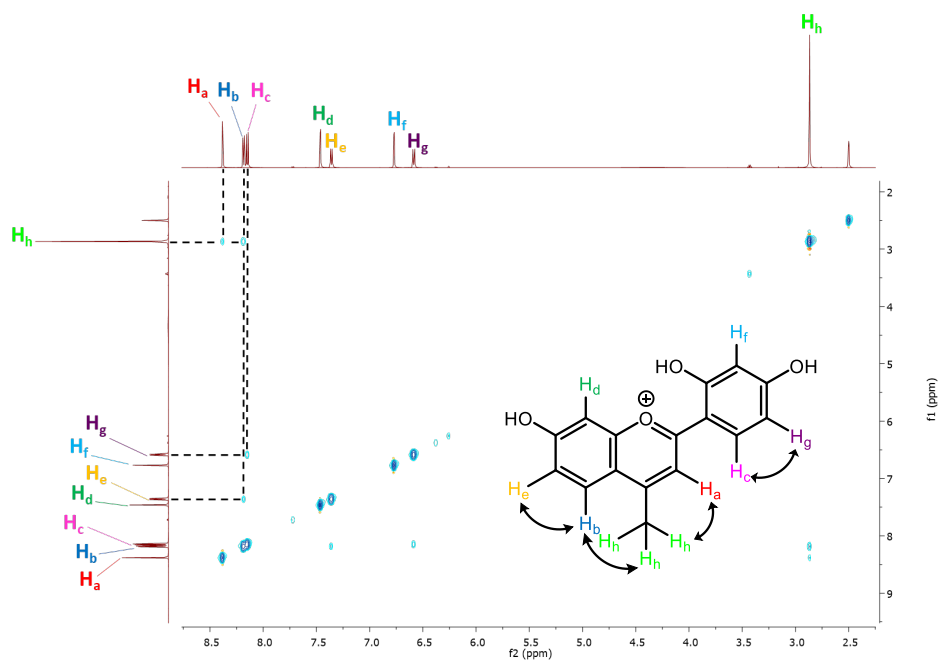

**Figure S35.**  $^1\text{H}$ - $^1\text{H}$  NOESY NMR (600 MHz, 298 K) spectrum of anthocyanidin **32** in  $d_6$ -DMSO.

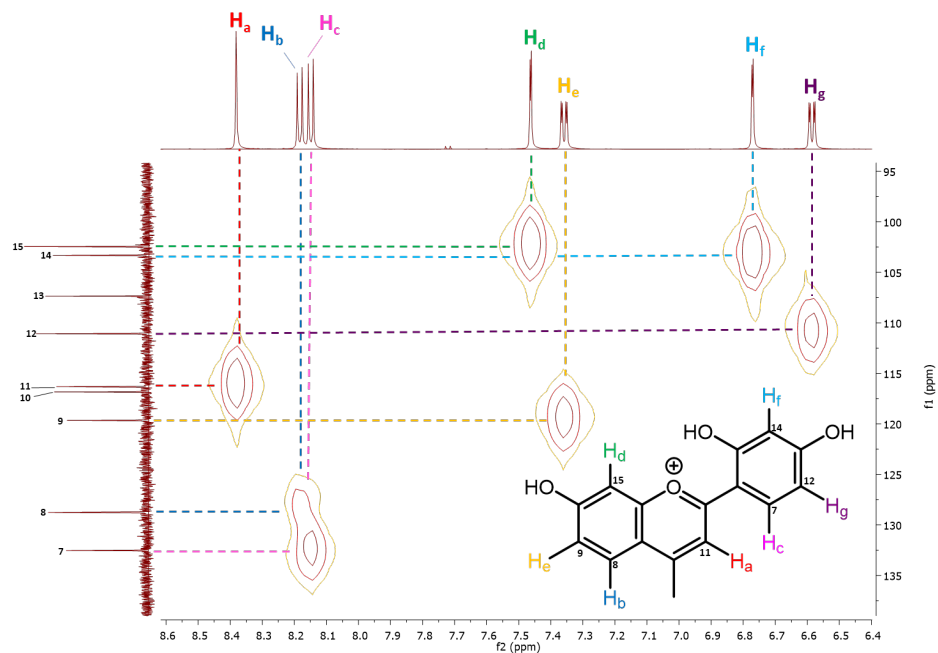

**Figure S36.**  $^1\text{H}$ - $^{13}\text{C}$  HSQC NMR (600 MHz, 298 K) spectrum of anthocyanidin **32** in  $d_6$ -DMSO.

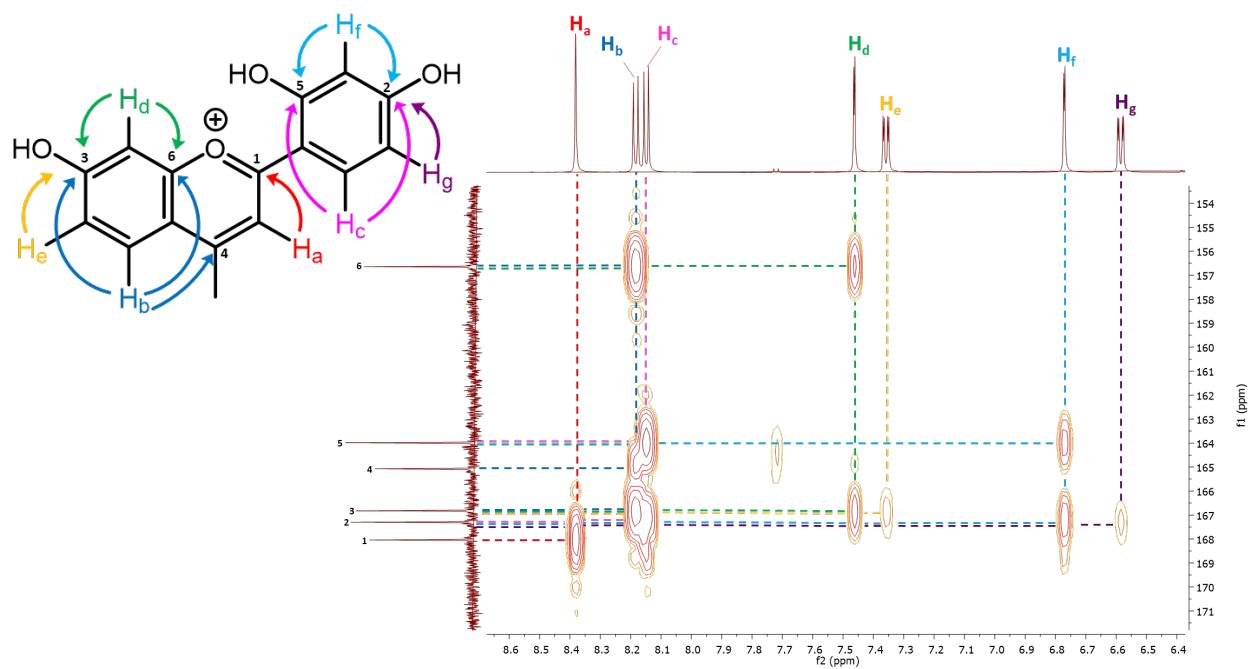

**Figure S37.**  $^1\text{H}$ - $^{13}\text{C}$  HMBC NMR (600 MHz, 298 K) spectrum of anthocyanidin **32** in  $d_6$ -DMSO.



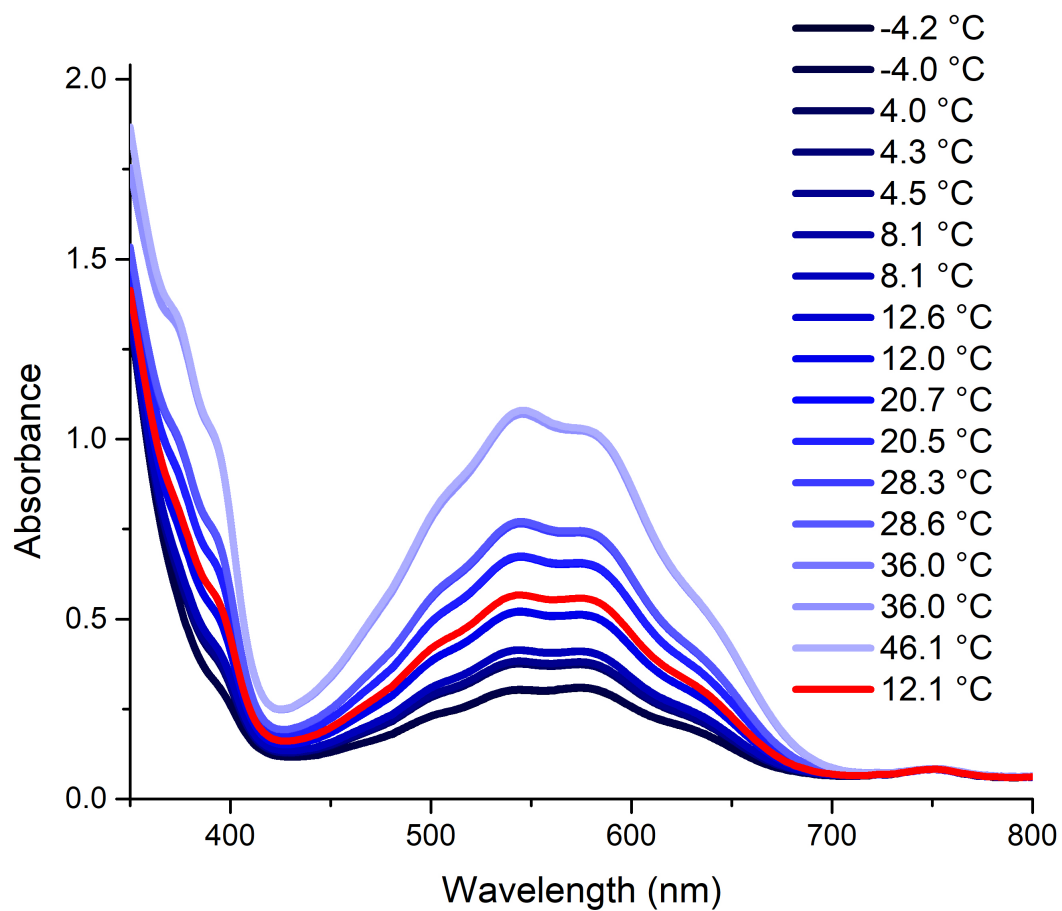

**Figure S38.** UV-vis spectra of 0.12 mM solution of bis-spiropyran **30** in  $\text{CH}_2\text{Cl}_2$  from -4.2 to 46.1 °C. After reaching 46.1 °C, we reduced to temperature to 12.1 °C with the spectrum showing that the process was not fully reversible.

## Crystallographic Data

**Compound 16:** The single crystal X-ray diffraction studies were carried out on a Bruker Kappa Photon II CPAD diffractometer equipped with Cu K $_{\alpha}$  radiation ( $\lambda = 1.54178$ ). A 0.197 x 0.153 x 0.118 mm piece of a colorless block was mounted on a Cryoloop with Paratone oil. Data were collected in a nitrogen gas stream at 100(2) K using  $\phi$  and  $\omega$  scans. Crystal-to-detector distance was 60 mm using variable exposure time (2s-10s) depending on  $\theta$  with a scan width of 1.0°. Data collection was 99.6% complete to 68.00° in  $\theta$ . A total of 20163 reflections were collected covering the indices,  $-13 \leq h \leq 13$ ,  $-9 \leq k \leq 12$ ,  $-28 \leq l \leq 27$ . 4420 reflections were found to be symmetry independent, with a  $R_{\text{int}}$  of 0.0269. Indexing and unit cell refinement indicated a primitive, monoclinic lattice. The space group was found to be  $P2_1/c$ . The data were integrated using the Bruker SAINT software program and scaled using the SADABS software program. Solution by direct methods (SHELXT) produced a complete phasing model for refinement.

All nonhydrogen atoms were refined anisotropically by full-matrix least-squares (SHELXL-2014). All hydrogen atoms were placed using a riding model. Their positions were constrained relative to their parent atom using the appropriate HFIX command in SHELXL-2014. Crystallographic data are summarized in Table S1.

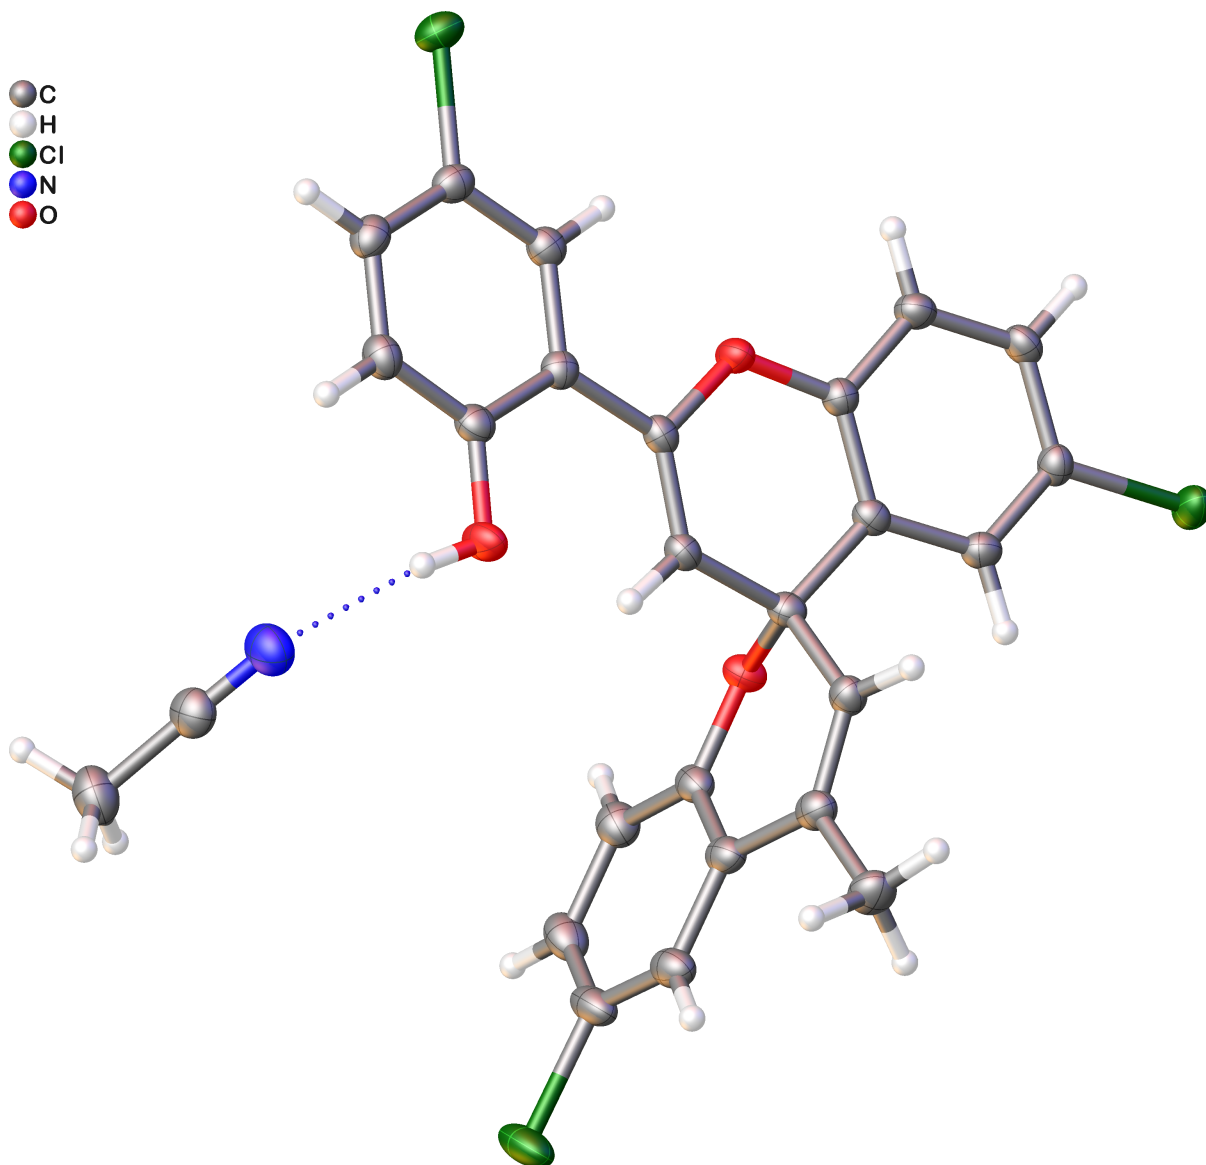

ORTEP plot of compound **16** (50% probability), grown by a slow evaporation of its acetonitrile solution.

**Table S1.** Crystal data and structure refinement for compound **16**.

|                                 |                                                                                                  |                   |
|---------------------------------|--------------------------------------------------------------------------------------------------|-------------------|
| Report date                     | 2020-03-18                                                                                       |                   |
| Identification code             | TN_ChloroClosed                                                                                  |                   |
| Empirical formula               | C <sub>26</sub> H <sub>18</sub> Cl <sub>3</sub> N O <sub>3</sub>                                 |                   |
| Molecular formula               | C <sub>24</sub> H <sub>15</sub> Cl <sub>3</sub> O <sub>3</sub> , C <sub>2</sub> H <sub>3</sub> N |                   |
| Formula weight                  | 498.76                                                                                           |                   |
| Temperature                     | 100 K                                                                                            |                   |
| Wavelength                      | 1.54178 Å                                                                                        |                   |
| Crystal system                  | Monoclinic                                                                                       |                   |
| Space group                     | P 1 2 <sub>1</sub> /c 1                                                                          |                   |
| Unit cell dimensions            | a = 10.7830(2) Å                                                                                 | α = 90°.          |
|                                 | b = 9.0950(2) Å                                                                                  | β = 96.6440(10)°. |
|                                 | c = 22.4992(4) Å                                                                                 | γ = 90°.          |
| Volume                          | 2191.71(7) Å <sup>3</sup>                                                                        |                   |
| Z                               | 4                                                                                                |                   |
| Density (calculated)            | 1.512 Mg/m <sup>3</sup>                                                                          |                   |
| Absorption coefficient          | 4.043 mm <sup>-1</sup>                                                                           |                   |
| F(000)                          | 1024                                                                                             |                   |
| Crystal size                    | 0.197 x 0.153 x 0.118 mm <sup>3</sup>                                                            |                   |
| Crystal color, habit            | Colorless Block                                                                                  |                   |
| Theta range for data collection | 3.956 to 74.555°.                                                                                |                   |
| Index ranges                    | -13 ≤ h ≤ 13, -9 ≤ k ≤ 11, -28 ≤ l ≤ 27                                                          |                   |
| Reflections collected           | 20163                                                                                            |                   |

|                                   |                                             |
|-----------------------------------|---------------------------------------------|
| Independent reflections           | 4420 [R(int) = 0.0269, R(sigma) = 0.0196]   |
| Completeness to theta = 68.000°   | 99.6 %                                      |
| Absorption correction             | Semi-empirical from equivalents             |
| Max. and min. transmission        | 0.3260 and 0.1942                           |
| Refinement method                 | Full-matrix least-squares on F <sup>2</sup> |
| Data / restraints / parameters    | 4420 / 0 / 301                              |
| Goodness-of-fit on F <sup>2</sup> | 1.053                                       |
| Final R indices [I>2sigma(I)]     | R1 = 0.0359, wR2 = 0.0923                   |
| R indices (all data)              | R1 = 0.0386, wR2 = 0.0946                   |
| Extinction coefficient            | n/a                                         |
| Largest diff. peak and hole       | 1.052 and -0.547 e.Å <sup>-3</sup>          |

**Compound 17:** The single crystal X-ray diffraction studies were carried out on a Bruker Kappa Photon II CPAD diffractometer equipped with Mo K $_{\alpha}$  radiation ( $\lambda = 0.71073 \text{ \AA}$ ). A 0.326 x 0.257 x 0.224 mm piece of a redish orange block was mounted on MiTeGen Micromount with CHRISTO-LUBE MCG 1024 oil. Data were collected in a nitrogen gas stream at 100(2) K using  $\phi$  and  $\omega$  scans. Crystal-to-detector distance was 60 mm using variable exposure time (2s-10s) depending on  $\theta$  with a scan width of 1.0°. Data collection was 99.6% complete to 25.00° in  $\theta$ . A total of 25940 reflections were collected covering the indices,  $-14 \leq h \leq 10$ ,  $-12 \leq k \leq 12$ ,  $-30 \leq l \leq 30$ . 5440 reflections were found to be symmetry independent, with a  $R_{\text{int}}$  of 0.0324. Indexing and unit cell refinement indicated a primitive, monoclinic lattice. The space group was found to be  $P2_1/c$ . The data were integrated using the Bruker SAINT software program and scaled using the SADABS software program. Solution by direct methods (SHELXT) produced a complete phasing model consistent with the proposed structure.

All nonhydrogen atoms were refined anisotropically by full-matrix least-squares (SHELXL-2014). All hydrogen atoms were placed using a riding model. Their positions were constrained relative to their parent atom using the appropriate HFIX command in SHELXL-2014. Crystallographic data are summarized in Table S2.

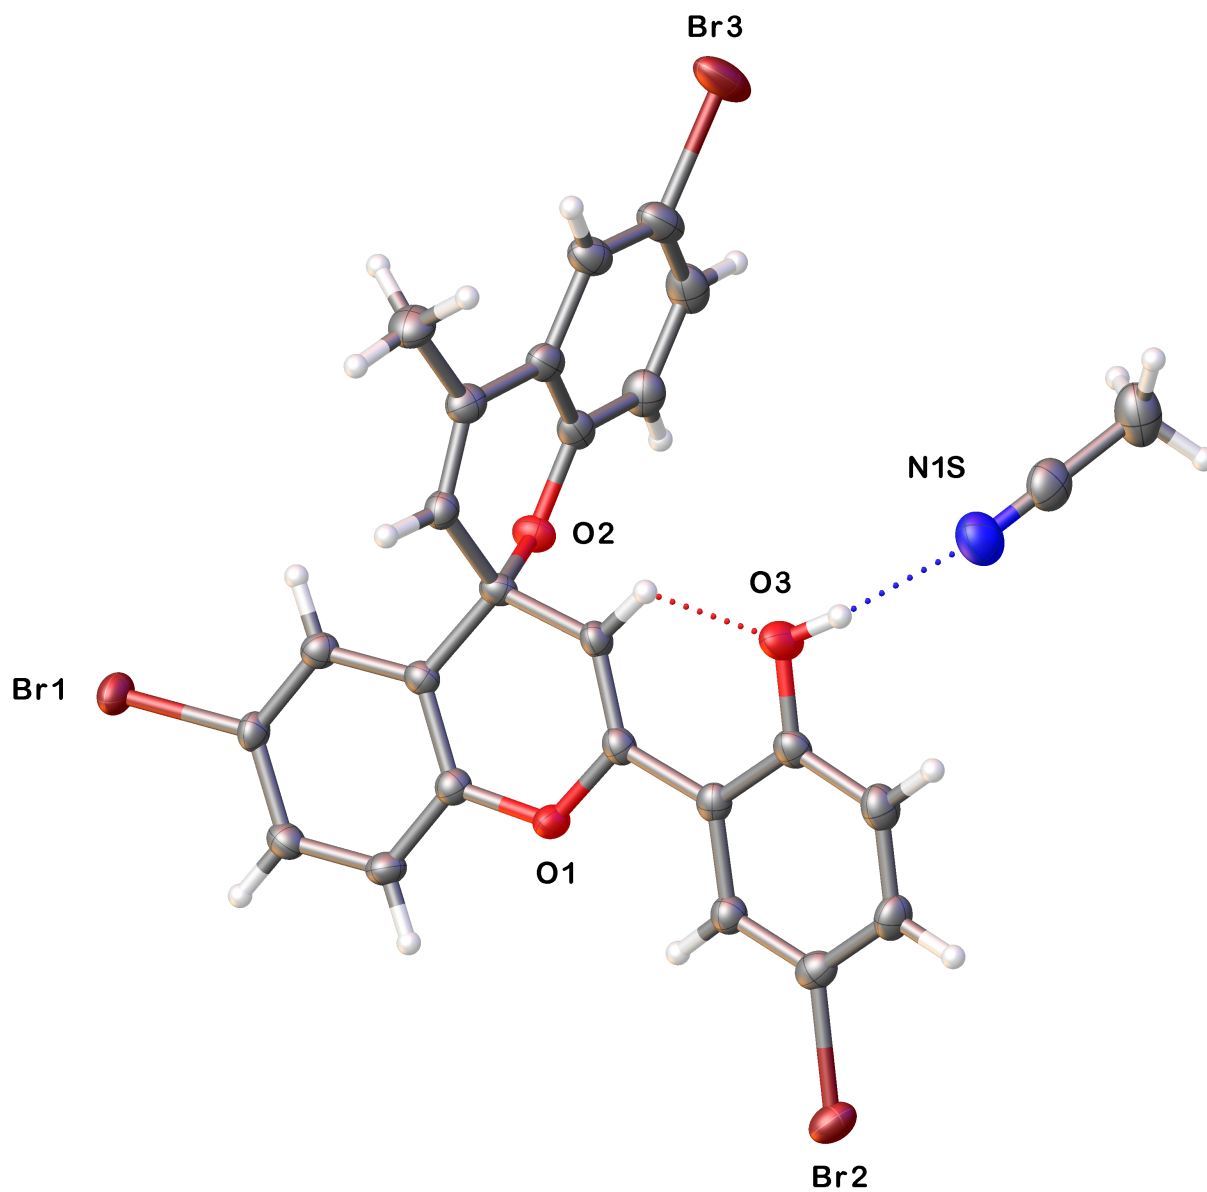

ORTEP plot of compound **17** (50% probability), grown by a slow evaporation of its acetonitrile solution.

**Table S2.** Crystal data and structure refinement for compound **17**.

|                                 |                                                                                                  |                 |
|---------------------------------|--------------------------------------------------------------------------------------------------|-----------------|
| Report date                     | 2019-05-13                                                                                       |                 |
| Identification code             | TN_ClosedCH3CN                                                                                   |                 |
| Empirical formula               | C <sub>26</sub> H <sub>18</sub> Br <sub>3</sub> N O <sub>3</sub>                                 |                 |
| Molecular formula               | C <sub>24</sub> H <sub>15</sub> Br <sub>3</sub> O <sub>3</sub> , C <sub>2</sub> H <sub>3</sub> N |                 |
| Formula weight                  | 632.14                                                                                           |                 |
| Temperature                     | 100.0 K                                                                                          |                 |
| Wavelength                      | 0.71073 Å                                                                                        |                 |
| Crystal system                  | Monoclinic                                                                                       |                 |
| Space group                     | P 1 21/c 1                                                                                       |                 |
| Unit cell dimensions            | a = 11.0228(6) Å                                                                                 | α = 90°.        |
|                                 | b = 9.1224(6) Å                                                                                  | β = 95.723(2)°. |
|                                 | c = 22.8268(14) Å                                                                                | γ = 90°.        |
| Volume                          | 2283.9(2) Å <sup>3</sup>                                                                         |                 |
| Z                               | 4                                                                                                |                 |
| Density (calculated)            | 1.838 Mg/m <sup>3</sup>                                                                          |                 |
| Absorption coefficient          | 5.329 mm <sup>-1</sup>                                                                           |                 |
| F(000)                          | 1240                                                                                             |                 |
| Crystal size                    | 0.326 x 0.257 x 0.224 mm <sup>3</sup>                                                            |                 |
| Crystal color, habit            | Redish Orange Block                                                                              |                 |
| Theta range for data collection | 2.864 to 28.293°.                                                                                |                 |
| Index ranges                    | -14 ≤ h ≤ 10, -12 ≤ k ≤ 12, -30 ≤ l ≤ 30                                                         |                 |
| Reflections collected           | 25940                                                                                            |                 |
| Independent reflections         | 5440 [R(int) = 0.0324, R(sigma) = 0.0303]                                                        |                 |



|                                   |                                             |
|-----------------------------------|---------------------------------------------|
| Completeness to theta = 25.000°   | 99.6 %                                      |
| Absorption correction             | Semi-empirical from equivalents             |
| Max. and min. transmission        | 0.0962 and 0.0466                           |
| Refinement method                 | Full-matrix least-squares on F <sup>2</sup> |
| Data / restraints / parameters    | 5440 / 0 / 301                              |
| Goodness-of-fit on F <sup>2</sup> | 1.070                                       |
| Final R indices [I>2sigma(I)]     | R1 = 0.0394, wR2 = 0.0856                   |
| R indices (all data)              | R1 = 0.0548, wR2 = 0.0907                   |
| Extinction coefficient            | n/a                                         |
| Largest diff. peak and hole       | 1.931 and -1.298 e.Å <sup>-3</sup>          |

**Compound 32** (methanol): The single crystal X-ray diffraction studies were carried out on a Nonius Kappa diffractometer equipped with a Bruker APEX-II CCD and Mo K $_{\alpha}$  radiation ( $\lambda = 0.71073 \text{ \AA}$ ). A 0.135 x 0.126 x 0.084 mm piece of a colorless block was mounted on a MiTeGen Micromount with CHRISTO-LUBE MCG 1024 oil. Data were collected in a nitrogen gas stream at 100(2) K using  $\phi$  and  $\omega$  scans. Crystal-to-detector distance was 50 mm and exposure time was 10 seconds per frame using a scan width of 1.0°. Data collection was 100% complete to 25.00° in  $\theta$ . A total of 22284 reflections were collected covering the indices,  $-11 \leq h \leq 11$ ,  $-17 \leq k \leq 17$ ,  $-15 \leq l \leq 15$ . 3129 reflections were found to be symmetry independent, with a  $R_{\text{int}}$  of 0.0427. Indexing and unit cell refinement indicated a primitive, monoclinic lattice. The space group was found to be  $P2_1/n$ . The data were integrated using the Bruker SAINT software program and scaled using the SADABS software program. Solution by direct methods (SHELXT) produced a complete phasing model consistent with the proposed structure. All nonhydrogen atoms were refined anisotropically by full-matrix least-squares (SHELXL-2014). All hydrogen atoms were placed using a riding model. Their positions were constrained relative to their parent atom using the appropriate HFIX command in SHELXL-2014. Crystallographic data are summarized in Table S3.

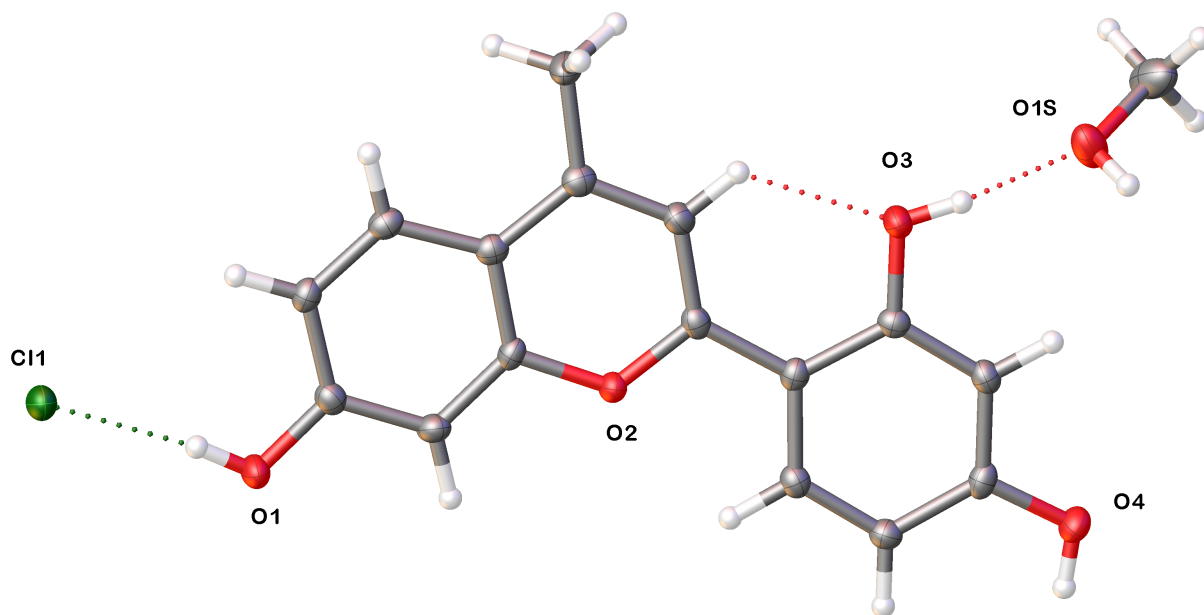

ORTEP plot of compound **32** (50% probability). Compound **32** was dissolved in methanol and then acetonitrile was carefully layered on top. The vial was loosely capped to allow slow evaporation of the solvents. Two polymorphs appeared from this mixture after several days.

**Table S3.** Crystal data and structure refinement for **compound 32** (methanol).

|                                 |                                          |                              |
|---------------------------------|------------------------------------------|------------------------------|
| Report date                     | 2019-05-13                               |                              |
| Identification code             | TN_0301MeOH                              |                              |
| Empirical formula               | C17 H17 Cl O5                            |                              |
| Molecular formula               | C16 H13 O4, C H4 O, Cl                   |                              |
| Formula weight                  | 336.75                                   |                              |
| Temperature                     | 100 K                                    |                              |
| Wavelength                      | 0.71073 Å                                |                              |
| Crystal system                  | Monoclinic                               |                              |
| Space group                     | P 1 21/n 1                               |                              |
| Unit cell dimensions            | a = 9.1565(3) Å                          | $\alpha = 90^\circ$ .        |
|                                 | b = 14.1329(5) Å                         | $\beta = 106.165(2)^\circ$ . |
|                                 | c = 12.2218(4) Å                         | $\gamma = 90^\circ$ .        |
| Volume                          | 1519.07(9) Å <sup>3</sup>                |                              |
| Z                               | 4                                        |                              |
| Density (calculated)            | 1.472 Mg/m <sup>3</sup>                  |                              |
| Absorption coefficient          | 0.276 mm <sup>-1</sup>                   |                              |
| F(000)                          | 704                                      |                              |
| Crystal size                    | 0.135 x 0.126 x 0.084 mm <sup>3</sup>    |                              |
| Crystal color, habit            | Colorless Block                          |                              |
| Theta range for data collection | 2.255 to 26.428°.                        |                              |
| Index ranges                    | -11 ≤ h ≤ 11, -17 ≤ k ≤ 17, -15 ≤ l ≤ 15 |                              |

|                                   |                                             |
|-----------------------------------|---------------------------------------------|
| Reflections collected             | 22284                                       |
| Independent reflections           | 3129 [R(int) = 0.0427, R(sigma) = 0.0300]   |
| Completeness to theta = 25.000°   | 100.0 %                                     |
| Absorption correction             | Semi-empirical from equivalents             |
| Max. and min. transmission        | 0.2602 and 0.2326                           |
| Refinement method                 | Full-matrix least-squares on F <sup>2</sup> |
| Data / restraints / parameters    | 3129 / 0 / 214                              |
| Goodness-of-fit on F <sup>2</sup> | 1.046                                       |
| Final R indices [I>2sigma(I)]     | R1 = 0.0367, wR2 = 0.0972                   |
| R indices (all data)              | R1 = 0.0511, wR2 = 0.1043                   |
| Extinction coefficient            | n/a                                         |
| Largest diff. peak and hole       | 0.323 and -0.299 e.Å <sup>-3</sup>          |

**Compound 32** (neat): The single crystal X-ray diffraction studies were carried out on a Bruker Kappa Photon II CPAD diffractometer equipped with Mo K $_{\alpha}$  radiation ( $\lambda = 0.71073 \text{ \AA}$ ). A 0.164 x 0.157 x 0.148 mm piece of a colorless block was mounted on MiTeGen Micromount with CHRISTO-LUBE MCG 1024 oil. Data were collected in a nitrogen gas stream at 100(2) K using  $\phi$  and  $\omega$  scans. Crystal-to-detector distance was 60 mm using variable exposure time (4s-10s) depending on  $\theta$  with a scan width of  $1.0^{\circ}$ . Data collection was 99.9% complete to  $25.00^{\circ}$  in  $\theta$ . A total of 13855 reflections were collected covering the indices,  $-7 \leq h \leq 5$ ,  $-19 \leq k \leq 19$ ,  $-17 \leq l \leq 17$ . 2718 reflections were found to be symmetry independent, with a  $R_{\text{int}}$  of 0.0343. Indexing and unit cell refinement indicated a primitive, monoclinic lattice. The space group was found to be  $P2_1/c$ . The data were integrated using the Bruker SAINT software program and scaled using the SADABS software program. Solution by direct methods (SHELXT) produced a complete phasing model consistent with the proposed structure.

All nonhydrogen atoms were refined anisotropically by full-matrix least-squares (SHELXL-2014). All hydrogen atoms were placed using a riding model. Their positions were constrained relative to their parent atom using the appropriate HFIX command in SHELXL-2014. Crystallographic data are summarized in Table S4.

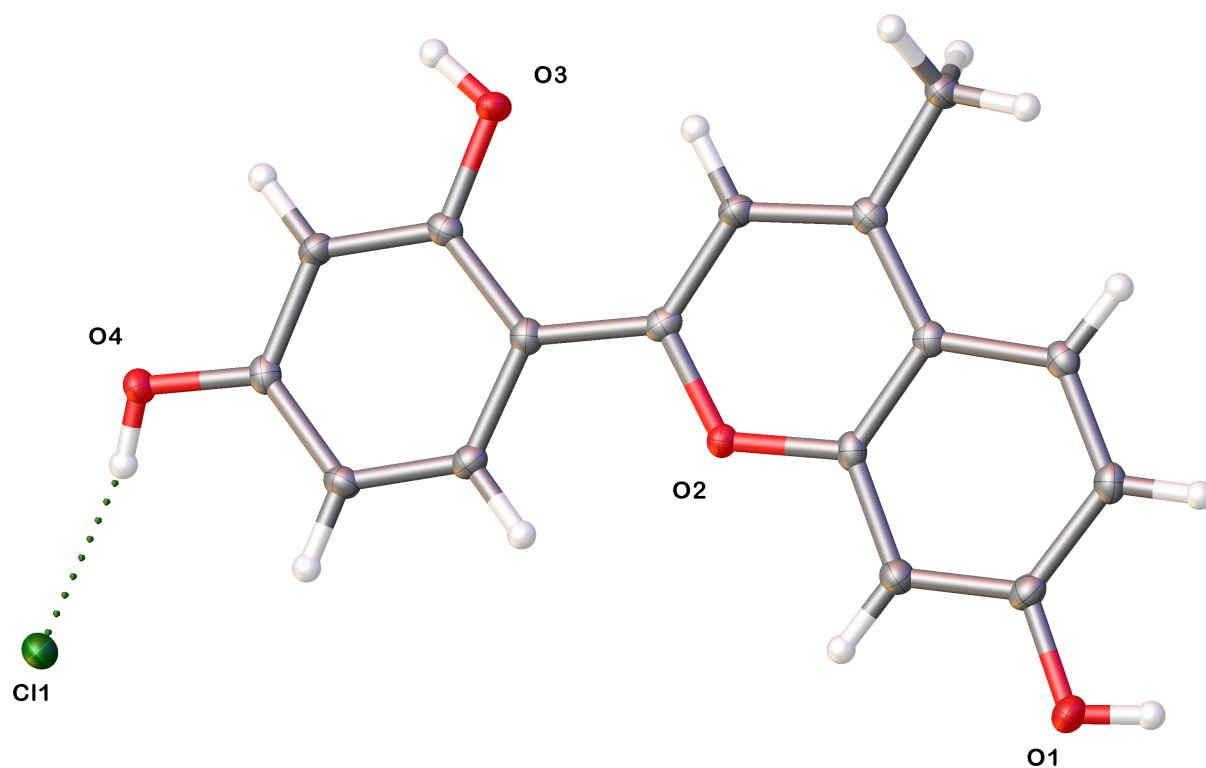

ORTEP plot of compound **32** (50% probability). Compound **32** was dissolved in methanol and then acetonitrile was carefully layered on top. The vial was loosely capped to allow slow evaporation of the solvents. Two polymorphs appeared from this mixture after several days.

**Table S4.** Crystal data and structure refinement for **compound 32** (neat).

|                                 |                                           |                              |
|---------------------------------|-------------------------------------------|------------------------------|
| Report date                     | 2019-05-13                                |                              |
| Identification code             | TN_0301Neat                               |                              |
| Empirical formula               | C16 H13 Cl O4                             |                              |
| Molecular formula               | C16 H13 O4, Cl                            |                              |
| Formula weight                  | 304.71                                    |                              |
| Temperature                     | 100.0 K                                   |                              |
| Wavelength                      | 0.71073 Å                                 |                              |
| Crystal system                  | Monoclinic                                |                              |
| Space group                     | P 1 21/c 1                                |                              |
| Unit cell dimensions            | a = 5.9006(3) Å                           | $\alpha = 90^\circ$ .        |
|                                 | b = 15.9293(9) Å                          | $\beta = 101.031(2)^\circ$ . |
|                                 | c = 14.4042(9) Å                          | $\gamma = 90^\circ$ .        |
| Volume                          | 1328.87(13) Å <sup>3</sup>                |                              |
| Z                               | 4                                         |                              |
| Density (calculated)            | 1.523 Mg/m <sup>3</sup>                   |                              |
| Absorption coefficient          | 0.301 mm <sup>-1</sup>                    |                              |
| F(000)                          | 632                                       |                              |
| Crystal size                    | 0.164 x 0.157 x 0.148 mm <sup>3</sup>     |                              |
| Crystal color, habit            | Colorless Block                           |                              |
| Theta range for data collection | 2.882 to 26.380°.                         |                              |
| Index ranges                    | -7 ≤ h ≤ 5, -19 ≤ k ≤ 19, -17 ≤ l ≤ 17    |                              |
| Reflections collected           | 13855                                     |                              |
| Independent reflections         | 2718 [R(int) = 0.0343, R(sigma) = 0.0269] |                              |



|                                         |                                       |
|-----------------------------------------|---------------------------------------|
| Completeness to $\theta = 25.000^\circ$ | 99.9 %                                |
| Absorption correction                   | Semi-empirical from equivalents       |
| Max. and min. transmission              | 0.2602 and 0.2237                     |
| Refinement method                       | Full-matrix least-squares on $F^2$    |
| Data / restraints / parameters          | 2718 / 0 / 194                        |
| Goodness-of-fit on $F^2$                | 1.044                                 |
| Final R indices [ $I > 2\sigma(I)$ ]    | $R_1 = 0.0323$ , $wR_2 = 0.0724$      |
| R indices (all data)                    | $R_1 = 0.0450$ , $wR_2 = 0.0809$      |
| Extinction coefficient                  | n/a                                   |
| Largest diff. peak and hole             | 0.266 and -0.263 e. $\text{\AA}^{-3}$ |

**Compound 33:** The single crystal X-ray diffraction studies were carried out on a Bruker Kappa Photon II CPAD diffractometer equipped with Mo K $_{\alpha}$  radiation ( $\lambda = 0.71073 \text{ \AA}$ ). A 0.154 x 0.138 x 0.127 mm piece of a colorless block was mounted on a MiTeGen Micromount with CHRISTO-LUBE MCG 1024 oil. Data were collected in a nitrogen gas stream at 100(2) K using  $\phi$  and  $\omega$  scans. Crystal-to-detector distance was 40 mm and exposure time was 60 seconds per frame using a scan width of 1.0°. Data collection was 99.7% complete to 25.00° in  $\theta$ . A total of 17236 reflections were collected covering the indices,  $-13 \leq h \leq 13$ ,  $-15 \leq k \leq 15$ ,  $-14 \leq l \leq 14$ . 2954 reflections were found to be symmetry independent, with a  $R_{\text{int}}$  of 0.0743. Indexing and unit cell refinement indicated a primitive, monoclinic lattice. The space group was found to be  $P2_1/n$ . The data were integrated using the Bruker SAINT software program and scaled using the SADABS software program. Solution by direct methods (SHELXT) produced a complete phasing model for refinement.

All nonhydrogen atoms were refined anisotropically by full-matrix least-squares (SHELXL-2014). All hydrogen atoms were placed using a riding model. Their positions were constrained relative to their parent atom using the appropriate HFIX command in SHELXL-2014. Crystallographic data are summarized in Table 1.

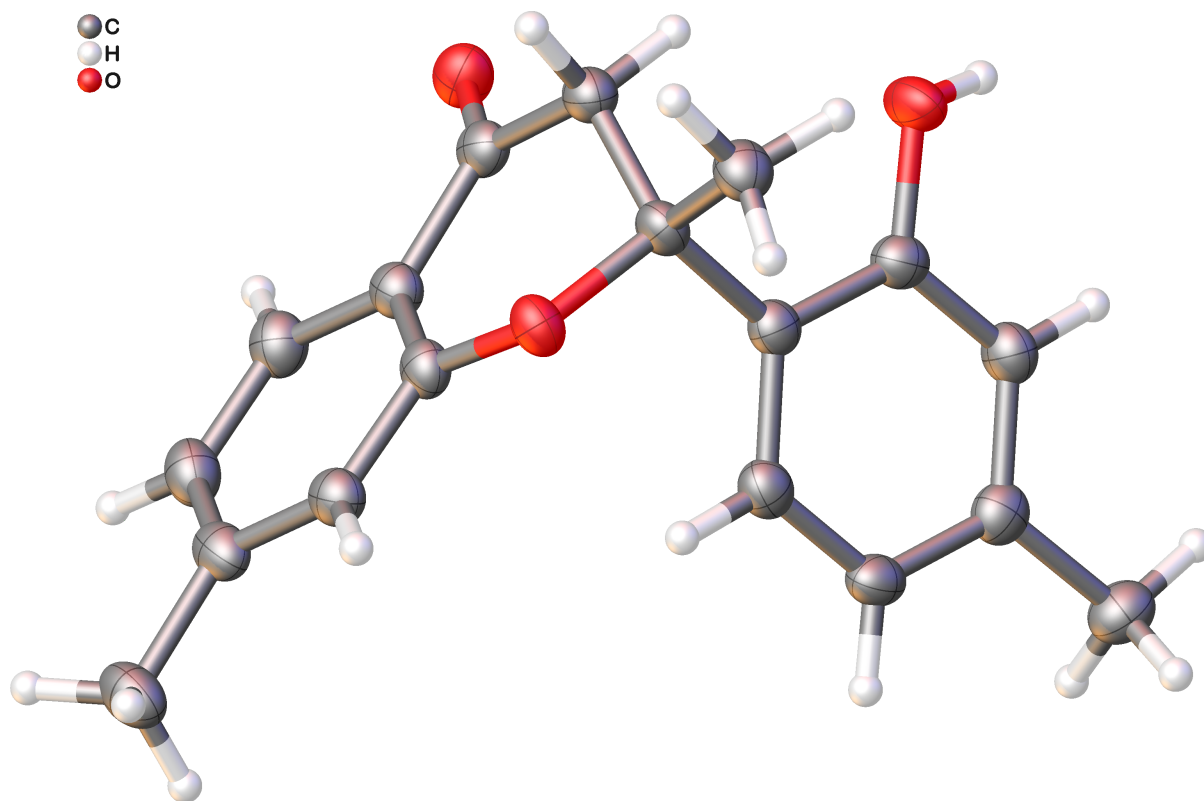

ORTEP plot of compound **33** (50% probability). Compound **30** was dissolved in a homogenous mixture of water, acetone, acetonitrile, and methanol in a vial. A pentane layer was then carefully added on top and the vial was loosely capped to allow a slow evaporation of solvents. Roughly 1.5-2 months later, the crystals formed from a very small amount of the remaining liquid.

**Table S5.** Crystal data and structure refinement for **compound 33**.

|                                 |                                          |                             |
|---------------------------------|------------------------------------------|-----------------------------|
| Report date                     | 2020-03-18                               |                             |
| Identification code             | TN_TetramerDecomp                        |                             |
| Empirical formula               | C18 H18 O3                               |                             |
| Molecular formula               | C18 H18 O3                               |                             |
| Formula weight                  | 282.32                                   |                             |
| Temperature                     | 100 K                                    |                             |
| Wavelength                      | 0.71073 Å                                |                             |
| Crystal system                  | Monoclinic                               |                             |
| Space group                     | P 1 21/n 1                               |                             |
| Unit cell dimensions            | a = 10.5278(6) Å                         | $\alpha = 90^\circ$ .       |
|                                 | b = 12.1806(6) Å                         | $\beta = 99.627(2)^\circ$ . |
|                                 | c = 11.4454(6) Å                         | $\gamma = 90^\circ$ .       |
| Volume                          | 1447.03(13) Å <sup>3</sup>               |                             |
| Z                               | 4                                        |                             |
| Density (calculated)            | 1.296 Mg/m <sup>3</sup>                  |                             |
| Absorption coefficient          | 0.087 mm <sup>-1</sup>                   |                             |
| F(000)                          | 600                                      |                             |
| Crystal size                    | 0.154 x 0.138 x 0.127 mm <sup>3</sup>    |                             |
| Crystal color, habit            | Colorless Block                          |                             |
| Theta range for data collection | 2.953 to 26.382°.                        |                             |
| Index ranges                    | -13 ≤ h ≤ 13, -15 ≤ k ≤ 15, -14 ≤ l ≤ 14 |                             |
| Reflections collected           | 17236                                    |                             |

|                                   |                                             |
|-----------------------------------|---------------------------------------------|
| Independent reflections           | 2954 [R(int) = 0.0743, R(sigma) = 0.0466]   |
| Completeness to theta = 25.000°   | 99.7 %                                      |
| Absorption correction             | Semi-empirical from equivalents             |
| Max. and min. transmission        | 0.2602 and 0.2161                           |
| Refinement method                 | Full-matrix least-squares on F <sup>2</sup> |
| Data / restraints / parameters    | 2954 / 0 / 195                              |
| Goodness-of-fit on F <sup>2</sup> | 1.066                                       |
| Final R indices [I>2sigma(I)]     | R1 = 0.0457, wR2 = 0.1092                   |
| R indices (all data)              | R1 = 0.0918, wR2 = 0.1402                   |
| Extinction coefficient            | 0.021(4)                                    |
| Largest diff. peak and hole       | 0.217 and -0.235 e.Å <sup>-3</sup>          |
